# Supplementary material for: The Isolated in Utero Environment Is Conducive to the Emergence of RNA and DNA Virus Variants
Source: MDPI journal article supplement (doi:10.3390/v13091827), 2021-09-14
Supplement: s1 [file s1]

## File S2 - PCV2 DNA

Start with : CCGC,

PCV2 Sequence:

GGGCTGGCTGAACTTTTAAAAGTGAGCGGGAAAAATGCAGAAAGCGTGATTGGAAGACTAATGTACACGTCATTGTGGGGCCAC  
CTGGGTGTGGTAAAAAGCAAATGGGCTGCTAATTTTGCAGACCCGGAACACATACTGGAAACCACCTAGAAACAAGTGGTG  
GGATGGTTACCATGGTGAAGAAAGTGGTTGTTATTGATGACTTTTATGGCTGGCTGCCCTGGGATGATCTACTGAGACTGTGT  
GATCGATATCCATTGACTGTAGAGACTAAAGGTGGAAGTGTACCTTTTTTGGCCCGCAGTATTCTGATTACCAGCAATCAGA  
CCCCGTTGGAATGGTACTCCTCAACTGCTGTCCCAGCTGTAGAAGCTCTTTATCGGAGGATTACTTCCTTGGTATTTTGGAA  
GAATGCTACAGAACAATCCACGGAGGAAGGGGGCCAGTTCGTACCCCTTTCCCCCATGCCCTGAATTTCCATATGAAATA  
AATTACTGAGTCTTTTTTATCACTTCGTAATGGTTTTTATTATTCAATTAAGGGTTAAGTGGGGGGTCTTTAAGATTAAATTC  
TCTGAATTGTACATACATGGTTACACGGATATTGTATTCTGGTCGTATATACTGTTTTTCGAACGCAGTGCCGAGGCCTACG  
TGGTCTACATTTCCAGCAGTTTGTAGTCTCAGCCACAGCTGGTTTTCTTTGTTGTTTGGTTGGAAGTAATCAATAGTGGAAAT  
CTAGGACAGGTTTGGGGGTAAAGTAGCGGGAGTGGTAGGAGAAGGGCTGGGTTATGGTATGGCGGGAGGAGTAGTTTACATA  
GGGGTCATAGGTGAGGGCTGTGGCCTTTGTTACAAAGTTATCATCTAGAATAACAGCACTGGAGCCCACTCCCCTGTCACCC  
TGGGTGATCGGGGAGCAGGGCCAGAATTCAACCTTAACCTTTCTTATTCTGTAGTATTCAAAGGGCACAGAGCGGGGGTTTG  
AGCCCCCTCCTGGGGGAAGAAAGTCATTAATATTGAATCTCATCATGTCCACCGCCAGGAGGGCGTTCTGACTGTGGTTTCG  
CTTGATAGTATATCCGAAGGTGCGGGATAGGCGGGTGTTGAAGATGCCATTTTTCTTCTCCAGCGGTAACGGTGGCGGGGG  
TGGACGAGCCAGGGGCGGCGGGGAGGATCTGGCCAAGATGGCTGCGGGGGCGGTGTCTTCTTTCCGGTAACGCCTCCTTG  
GATACGTCATATCTGAAAACGAAAGAAGTGCGCTGTAAAGTATTACCAGCGCACTTCGGCAGCGGCAGCACCTCGGCAGCACC  
TCAGCAGCAACATGCCCAGCAAGAAGAATGGAAGAAGCGGACCCCAACCCCATAAAAGGTGGGTGTTCACTCTGAATAATCC  
TTCCGAAGACGAGCGCAAGAAAATACGGGATCTTCCAATATCCCTATTTGATTATTTTATTGTTGGCGAGGAGGGTAATGAG  
GAAGGACGAACACCTCACCTCCAGGGGTTTCGTAATTTTGTGAAGAAGCAGACTTTTAATAAAGTGAAGTGGTATTTGGGTG  
CCCGCTGCCACATCGAGAAAAGCCAAAGGAACAGATCAGCAGAATAAAGAATACTGCAGTAAAGAAGGCAACTTACTGATTGA  
GTGTGGAGCTCCTAGATCTCAGGGACAACGGAGTGACCTGTCTACTGCTGTGAGTACCTTGTGGAGAGCGGGAGTCTGGTG  
ACCGTTGCAGAGCAGTACCCTGTAACGTTTGTGAGAAATTTCCGC

End with : GG.
