# Supplementary material for: The Isolated in Utero Environment Is Conducive to the Emergence of RNA and DNA Virus Variants
Source: Viruses. 2021 Sep 14;13(9):1827. doi: 10.3390/v13091827 (PMC8473323; doi:10.3390/v13091827)
Supplement: Supplementary file 1 [file viruses-13-01827-s001.zip]

Archive with 10 entries (10 files):
- Figure S1 Zika virus NGS coverage.pdf
- Figure S2 Porcine circovirus 2 NGS coverage.pdf
- File S1 - iVar protocol.pdf
- File S2 - PCV2 DNA.pdf
- Table S1 - ZIKV and PCV2 PrimalSeq primers.xlsx
- Table S2 - ZIKV and PCV2 in utero infection data.xlsx
- Table S3 - ZIKV and PCV2-infected samples and NGS overview.xlsx
- Table S4 - ZIKV and PCV2 SNVs.xlsx
- Table S5 - NGS coverage gaps in the ZIKV genome.xlsx
- Table S6 - In utero-emerged ZIKV and PCV2 iSNVs previously reported in field samples.xlsx
