# Supplementary material for: The Isolated in Utero Environment Is Conducive to the Emergence of RNA and DNA Virus Variants
Source: Viruses. 2021 Sep 14;13(9):1827. doi: 10.3390/v13091827 (PMC8473323; doi:10.3390/v13091827)
Supplement: Supplementary file 1 [file viruses-13-01827-s001.zip › Table S1 - ZIKV and PCV2 PrimalSeq primers.xlsx]

## Sheet: ZIKV primers
ZIKV H/PF/2013
Primer Name	Sequence	Multiplex primer scheme 1 and 2
ZIKA_400_1_LEFT (Forward)	TGAATCAGACTGCGACAGTTCG	1
ZIKA_400_1_RIGHT (Reverse)	AGTATGCACTCCCACGTCTAGT	1
ZIKA_400_2_LEFT	AAGAAAGATCTGGCTGCCATGC	2
ZIKA_400_2_RIGHT	TGATTCCAACCAGGTTTGCGAC	2
ZIKA_400_3_LEFT	AGATGACGTCGATTGTTGGTGC	1
ZIKA_400_3_RIGHT	TACGGTGACACAACCTCCATGT	1
ZIKA_400_4_LEFT	TCAGGTGCATAGGAGTCAGCAA	2
ZIKA_400_4_RIGHT	GGAGCCATGAACTGACAGCATT	2
ZIKA_400_5_LEFT	AGAACGTTAGTGGACAGAGGCT	1
ZIKA_400_5_RIGHT	TGTGCGTCCTTGAACTCTACCA	1
ZIKA_400_6_LEFT	TTGATTGTGAACCGAGGACAGG	2
ZIKA_400_6_RIGHT	CCATCTGTCCCTGCGTACTGTA	2
ZIKA_400_7_LEFT	TGAAGGGCGTGTCATACTCCTT	1
ZIKA_400_7_RIGHT	CGCCTCCAACTGATCCAAAGTC	1
ZIKA_400_8_LEFT	GGGAGAAGAAGATCACCCACCA	2
ZIKA_400_8_RIGHT	TTGACTGCTGCTGCCAATCTAC	2
ZIKA_400_9_LEFT	GCCTTAGGGGGAGTGTTGATCT	1
ZIKA_400_9_RIGHT	GAGTGGGCATTCCTTCAGTGTG	1
ZIKA_400_10_LEFT	ACGGTCGTTGTGGGATCTGTAA	2
ZIKA_400_10_RIGHT	GTGGGACTTTGGCCATTCACAT	2
ZIKA_400_11_LEFT	CAGCCGTTATTGGAACAGCTGT	1
ZIKA_400_11_RIGHT	CCTGGGCCTTATCTCCATTCCA	1
ZIKA_400_12_LEFT	CACTAAGGTCCACGTGGAGGAA	2
ZIKA_400_12_RIGHT	TATCAGCGCCAGATGAGCTACA	2
ZIKA_400_13_LEFT	TGGCAGTGCTGGTAGCTATGAT	1
ZIKA_400_13_RIGHT	AGAGAGAGGAGCATAAACCCCC	1
ZIKA_400_14_LEFT	CAATGGTTTTGCTTTGGCCTGG	2
ZIKA_400_14_RIGHT	TTTCCCATGTGATGTCACCTGC	2
ZIKA_400_15_LEFT	CCCTAGCGAAGTACTCACAGCT	1
ZIKA_400_15_RIGHT	TACACTCCATCTGTGGTCTCCC	1
ZIKA_400_16_LEFT	GTGGCATGAACCCAATAGCCAT	2
ZIKA_400_16_RIGHT	GCTCCAATGTCCCCATCCTTTG	2
ZIKA_400_17_LEFT	GTGGTCCATGGAAGCTAGATGC	1
ZIKA_400_17_RIGHT	CCTCTAAGGGCTTCCTCCA	1
ZIKA_400_18_LEFT	CTGTTGAGTGCTTCGAGCCTTC	2
ZIKA_400_18_RIGHT	TGGTGAGTTGGAGTCCGGAAAT	2
ZIKA_400_19_LEFT	TATGGATGAGGCCCACTTCACA	1
ZIKA_400_19_RIGHT	GCCATCAAGTATGACCGGCTTT	1
ZIKA_400_20_LEFT	GGCTGGAAAACGGGTCATACAG	2
ZIKA_400_20_RIGHT	CCTTTGCTCCGTCCTAAGCTTG	2
ZIKA_400_21_LEFT	AGAGACTGACGAAGACCATGCA	1
ZIKA_400_21_RIGHT	CTCCAAAAGCCGCTCCTCTTTT	1
ZIKA_400_22_LEFT	TGGACCAGACACGGAGAGAAAA	2
ZIKA_400_22_RIGHT	ATTCTGGCTGGCTCAATTTCCG	2
ZIKA_400_23_LEFT	CGTCTTGATGAGGAACAAGGGC	1
ZIKA_400_23_RIGHT	AAGTGGTCACTGCATGTTGGAC	1
ZIKA_400_24_LEFT	TAATGGGAAGGAGAGAGGAGGG	2
ZIKA_400_24_RIGHT	TCTCCACTTGGGGGTCAATTGT	2
ZIKA_400_25_LEFT	CCCTGACCCTAATAGTGGCCAT	1
ZIKA_400_25_RIGHT	CCTTCCATTTCTCTCCCAGGGT	1
ZIKA_400_26_LEFT	ACTGGAACTCCTCTACAGCCAC	2
ZIKA_400_26_RIGHT	ACCAGGGCCTCCTTTTGTGTAT	2
ZIKA_400_27_LEFT	AGTGCAAAGCTGAGATGGTTGG	1
ZIKA_400_27_RIGHT	ATGTGTAGAGTTGCGGGAGAGT	1
ZIKA_400_28_LEFT	GGTGGGGGATTGGCTTGAAAAA	2
ZIKA_400_28_RIGHT	GGGCCTCATAGCTTCCATGGTA	2
ZIKA_400_29_LEFT	AGGATGTGAATCTCGGCTCTGG	1
ZIKA_400_29_RIGHT	ATGCTGCATTGCTACGAACCTT	1
ZIKA_400_30_LEFT	AAAAGTGGACACTAGGGTGCCA	2
ZIKA_400_30_RIGHT	TAATCCCAGCCCTTCAACACCA	2
ZIKA_400_31_LEFT	ACAAGGGGAATTTGGAAAGGCC	1
ZIKA_400_31_RIGHT	CGTAAGTGACAACTTGTCCGCT	1
ZIKA_400_32_LEFT	ACCAACCAAATGGAGAAAGGGC	2
ZIKA_400_32_RIGHT	TGTCCCATCCAGTTGAGGGTTT	2
ZIKA_400_33_LEFT	CAAACGAATGGCAGTCAGTGGA	1
ZIKA_400_33_RIGHT	ATCCACACTCTGTTCCACACCA	1
ZIKA_400_34_LEFT	ATTTCCACAGAAGGGACCTCCG	2
ZIKA_400_34_RIGHT	TGACTAGCAGGCCTGACAACAT	2
ZIKA_400_35_LEFT	ACCACCTGGGCTGAGAACATTA	1
ZIKA_400_35_RIGHT	ACCACTAGTCCCTCTTCTGGAG	1
ZIKA_400_36_LEFT	TAGTCAGCCACAGCTTGG	2
ZIKA_400_36_RIGHT	ATGGATTTCCCCACACCG	2
Two multiplex primer schemes previously designed with a web-based tool Primal Scheme for ZIKV PRVABC59 strain were used (Quick et al. Nature Protocols volume 12, 1261–1276, 2017)
Primers ZIKA_400_1_LEFT, ZIKA_400_17_RIGHT, ZIKA_400_32_LEFT were modified
Primers ZIKA_400_36_LEFT and ZIKA_400_36_RIGHT were added

## Sheet: PCV2 primers
PCV2 BaPCV2b
Primer Name	Sequence
PCV2_1_LEFT (Forward)	ACATGCCCAGCAAGAAGAATGG
PCV2_1_RIGHT (Reverse)	ACAGCAGTAGACAGGTCACTCC
PCV2_2_LEFT	GCCAAAGGAACAGATCAGCAGA
PCV2_2_RIGHT	TGGTAACCATCCCACCACTTGT
PCV2_3_LEFT	CACCTGGGTGTGGTAAAAGCAA
PCV2_3_RIGHT	CCCTTCCTCCGTGGATTGTTCT
PCV2_4_LEFT	TACTCCTCAACTGCTGTCCCAG
PCV2_4_RIGHT	ACTTTACCCCCAAACCTGTCCT
PCV2_5_LEFT	CGTGGTCTACATTTCCAGCAGT
PCV2_5_RIGHT	GGCGGTGGACATGATGAGATTC
PCV2_6_LEFT	GAATAACAGCACTGGAGCCCAC
PCV2_6_RIGHT	GGAGGCGTTACCGGAAAAGAAG
