# Supplementary material for: The Isolated in Utero Environment Is Conducive to the Emergence of RNA and DNA Virus Variants
Source: Viruses. 2021 Sep 14;13(9):1827. doi: 10.3390/v13091827 (PMC8473323; doi:10.3390/v13091827)
Supplement: Supplementary file 1 [file viruses-13-01827-s001.zip › Table S2 - ZIKV and PCV2 in utero infection data.xlsx]

## Sheet: ZIKV in utero infection data
Challenge virus	Pig #	Fetus #	Pathology	Brain	Placenta	Lymph node
				Log10 ZIKV RNA copies/gram	Log10 ZIKV RNA copies/gram	Log10 ZIKV RNA copies/gram
ZIKV-PF	313-10F	F1		neg	neg	4.76267
		F2	mummy	na	neg	na
		F3		neg	neg	4.78274
		F4		neg	neg	4.99609
		F5		neg	neg	4.58509
		F6		neg	neg	4.69863
		F7		neg	neg	5.04241
		F8	mummy	na	5.63956	5.01955
		F9		neg	5.83473	na
		F10		neg	7.2989	5.8156
		F11		neg	6.60605	5.14663
		F12*		neg	9.06608	4.72851
		F13*		neg	7.00488	neg
		F14*	small	neg	8.0668	neg
		F15*		neg	5.80454	5.40389
* - directly inoculated fetuses
ZIKV-PF: Zika virus PF strain
Highlighted are samples selected for ZIKV NGS
In green are samples that showed correct gel bands (around 400 bp) after amplification with PrimalSeq primer set
In red are samples that did not show correct gel bands after amplification with PrimalSeq primer set
na: not available
neg: negative

## Sheet: PCV2 in utero infection data
Challenge virus	Pig #	Fetus #	Pathology	Blood plasma	Blood plasma	Heart	Heart	Spleen	Spleen	Brain	Brain	Placenta	Placenta
				log10 PCV2 TCID50/ml	log10 PCV2 DNA copies/ml	log10 PCV2 TCID50/g	log10 PCV2 DNA copies/g	log10 PCV2 TCID50/g	log10 PCV2 DNA copies/g	log10 PCV2 TCID50/g	log10 PCV2 DNA copies/g	log10 PCV2 TCID50/g	log10 PCV2 DNA copies/g
PCV2	553-4E	F1		neg	nd	neg	nd	neg	nd	neg	nd	neg	nd
		F2		neg	nd	neg	nd	neg	nd	neg	nd	neg	nd
		F3		neg	nd	neg	nd	neg	nd	neg	nd	neg	nd
		F4		neg	nd	neg	nd	neg	nd	neg	nd	neg	nd
		F5		neg	nd	neg	nd	neg	nd	neg	nd	neg	nd
		F6		neg	nd	neg	nd	neg	nd	neg	nd	neg	nd
		F7		neg	nd	neg	nd	neg	nd	neg	nd	neg	nd
		F8		neg	nd	neg	nd	neg	nd	neg	nd	neg	nd
		F9		neg	nd	neg	nd	neg	nd	neg	nd	neg	nd
		F10*	edemas; hemorrhages	neg	10.662	4.53	12.4138	neg	13.22	neg	13.3883	neg	6.24186
		F11*		neg	7.92228	2.06	11.4595	neg	11.9515	2.06	9.82963	2.47	9.69405
		F12*		neg	7.4875	2.42	10.1777	4.23	12.5119	neg	8.79613	neg	8.94308
		F13*	edemas; hemorrhages	neg	9.18792	4.19	13.1544	3.64	13.3267	2.09	9.92	neg	9.57236
		F14*	mummy	na	na	na	na	na	na	na	na	na	na
* - directly inoculated fetuses
Highlighted are samples selected for PCV2 NGS
In green are samples that showed correct (around 360-420 bp) gel bands after amplification with PrimalSeq primers
In red are samples that did not show correct gel bands after amplification with PrimalSeq primers
na: not available
neg: negative
nd: not done
