# Supplementary material for: The Isolated in Utero Environment Is Conducive to the Emergence of RNA and DNA Virus Variants
Source: Viruses. 2021 Sep 14;13(9):1827. doi: 10.3390/v13091827 (PMC8473323; doi:10.3390/v13091827)
Supplement: Supplementary file 1 [file viruses-13-01827-s001.zip › Table S3 - ZIKV and PCV2-infected samples and NGS overview.xlsx]

## Sheet: ZIKV-PF
Table S3 - ZIKV-infected samples and NGS overview
ZIKV study
Fetus/Sample ID	Tissue type	Origin	ZIKV fetal inoculation	ZIKV RNA input (copies per reaction)*	NGS ZIKV genome coverage (%)
ZIKV-PF-Stock-a	C6/36 cells	ISA, virus stock		198000000	92
ZIKV-PF-Stock-b	C6/36 cells	ISA, virus stock		198000000	92
ZIKV-F8-PL-a	Placenta	Gilt-313-10f	Trans-infection	2597	86.6
ZIKV-F8-PL-b	Placenta	Gilt-313-10f	Trans-infection	2597	88.2
ZIKV-F9-PL-a	Placenta	Gilt-313-10f	Trans-infection	3829	91.6
ZIKV-F9-PL-b	Placenta	Gilt-313-10f	Trans-infection	3829	90
ZIKV-F11-PL-a	Placenta	Gilt-313-10f	Trans-infection	24010	95.8
ZIKV-F11-PL-b	Placenta	Gilt-313-10f	Trans-infection	24010	92
ZIKV-F12-PL-a	Placenta	Gilt-313-10f	IP+IA	6517000	98.2
ZIKV-F12-PL-b	Placenta	Gilt-313-10f	IP+IA	6517000	98.2
ZIKV-F15-PL-a	Placenta	Gilt-313-10f	IP+IA	3346	92
ZIKV-F15-PL-b	Placenta	Gilt-313-10f	IP+IA	3346	91.6
ZIKV-F11-LN-a	Lymph node	Gilt-313-10f	Trans-infection	735**	88.8
ZIKV-F11-LN-b	Lymph node	Gilt-313-10f	Trans-infection	735**	88.8
ZIKV-F12-LN-a	Lymph node	Gilt-313-10f	IP+IA	299**	58.8**
ZIKV-F12-LN-b	Lymph node	Gilt-313-10f	IP+IA	299**	76.2**
"a" and "b": Represent technical replicates
PL: Placenta
LN: Lymph node
IP+IA: Intraperitoneal and intra-amniotic inoculation
ISA: Infectious Subgenomic Amplicons method
Gilt-313-10f: An identification number of the pregnant pig
*The input of ZIKV RNA (measured with RT-qPCR) for reverse transcriptase reaction to produce cDNA
**Samples with ZIKV RNA input lower than 1,000 copies per reverse transcriptase reaction, and with a low NGS ZIKV genome coverage were interpreted with caution

## Sheet: PCV2
Table S3 - PCV2-infected samples and NGS overview
PCV2 study
Fetus/Sample ID	Tissue type	Origin	PCV2 fetal inoculation	PCV2 DNA input (copies per reaction)*	NGS PCV2 genome coverage (%)
PCV2-Stock-a	VR1BL cells	transfection, virus stock		77167245	97.5
PCV2-Stock-b	VR1BL cells	transfection, virus stock		77167245	94.7
PCV2-F10-BL-a	Blood plasma	Gilt-553-4E	IP+IA	160721895	94.7
PCV2-F10-BL-b	Blood plasma	Gilt-553-4E	IP+IA	160721895	94.7
PCV2-F10-BR-a	Brain	Gilt-553-4E	IP+IA	1.29589e+11	94.7
PCV2-F10-BR-b	Brain	Gilt-553-4E	IP+IA	1.29589e+11	94.7
PCV2-F10-HE-a	Heart	Gilt-553-4E	IP+IA	13030148781	94.7
PCV2-F10-HE-b	Heart	Gilt-553-4E	IP+IA	13030148781	94.7
PCV2-F10-SP-a	Spleen	Gilt-553-4E	IP+IA	82984962945	97.2
PCV2-F10-SP-b	Spleen	Gilt-553-4E	IP+IA	82984962945	97.3
PCV2-F11-BL-a	Blood plasma	Gilt-553-4E	IP+IA	292650	94.7
PCV2-F11-BL-b	Blood plasma	Gilt-553-4E	IP+IA	292650	94.7
PCV2-F11-HE-a	Heart	Gilt-553-4E	IP+IA	1533998361	94.7
PCV2-F11-HE-b	Heart	Gilt-553-4E	IP+IA	1533998361	94.7
PCV2-F12-BL-a	Blood plasma	Gilt-553-4E	IP+IA	107539	94.7
PCV2-F12-BL-b	Blood plasma	Gilt-553-4E	IP+IA	107539	94.7
PCV2-F12-SP-a	Spleen	Gilt-553-4E	IP+IA	8694598928	82.6
PCV2-F12-SP-b	Spleen	Gilt-553-4E	IP+IA	8694598928	70.6**
PCV2-F13-BL-a	Blood plasma	Gilt-553-4E	IP+IA	5394899	94.7
PCV2-F13-BL-b	Blood plasma	Gilt-553-4E	IP+IA	5394899	0***
PCV2-F13-BR-a	Brain	Gilt-553-4E	IP+IA	40200000	94.7
PCV2-F13-BR-b	Brain	Gilt-553-4E	IP+IA	40200000	94.7
PCV2-F13-HE-a	Heart	Gilt-553-4E	IP+IA	68488308194	94.7
PCV2-F13-HE-b	Heart	Gilt-553-4E	IP+IA	68488308194	94.7
PCV2-F13-SP-a	Spleen	Gilt-553-4E	IP+IA	68959547240	94.4
PCV2-F13-SP-b	Spleen	Gilt-553-4E	IP+IA	68959547240	94.4
"a" and "b": Represent technical replicates
BL: Blood plasma
BR: Brain
HE: Heart
SP: Spleen
IP+IA: Intraperitoneal and intra-amniotic inoculation
Gilt-553-4E: An identification number of the pregnant pig
*The input of PCV2 DNA (measured with qPCR) for Primal Scheme PCR
**samples with a low NGS ZIKV genome coverage were interpreted with caution
***Only samples successfully sequenced in two duplicates were included in the analysis
