# Supplementary material for: The Isolated in Utero Environment Is Conducive to the Emergence of RNA and DNA Virus Variants
Source: Viruses. 2021 Sep 14;13(9):1827. doi: 10.3390/v13091827 (PMC8473323; doi:10.3390/v13091827)
Supplement: Supplementary file 1 [file viruses-13-01827-s001.zip › Table S4 - ZIKV and PCV2 SNVs.xlsx]

## Sheet: PF-ZIKV
Table S4 - ZIKV SNVs
Supplementary Table S4 - ZIKV SNVs
Sample ID	Position in the ZIKV genome (nt #)	Reference nucleotide	Emerged nucleotide	Depth in replicate a (nt)	Depth in replicate b (nt)	Frequency of the nucleotides in replicate a (%)	Frequency of the nucleotides in replicate b (%)	Mean frequency (%)	Reference codon	Reference amino acid	Emerged codon	Emerged amino acid	ZIKV protein	Position of the amino acid in the specific protein (aa #)	Low-threshold SNV analysis (%; replicate a)**	Low-threshold SNV analysis (%; replicate b)**	Mean low-threshold SNV analysis (%)**
ZIKV-PF-Stock	170	A	G	6248	1821	16.2292	17.6277	16.9284	GTA	V	GTG	V	C	21
ZIKV-PF-Stock	355	A	G	6131	1733	16.4737	18.1189	17.2963	AAG	K	AGG	R	C	83
ZIKV-PF-Stock	931	A	G	1436	455	21.2396	24.1758	22.7077	AAA	K	AGA	R	pr-M	152
ZIKV-PF-Stock	4644	A	G	39139	11984	16.5053	18.0491	17.2772	AAG	K	GAG	E	NS3	11
ZIKV-PF-Stock	6083	A	G	11473	4245	18.8617	22.0024	20.4321	GCA	A	GCG	A	NS3	490
ZIKV-PF-Stock	7379	T	C	16292	6444	19.3469	18.9479	19.1474	ACT	T	ACC	T	NS4B	155
ZIKV-PF-Stock	9902	G	A	11628	3343	43.9112	56.0574	49.9843	GGG	G	GGA	G	NS5	745
ZIKV-F8-PL*	6010	A	G	528	320	41.4773	15.625	28.5511	AAA	K	AGA	R	NS3	466
ZIKV-F9-PL	49	A	G	1127	1531	5.50133	3.72306	4.61219	NA	NA	NA	NA	5'UTR	NA	0	0	0
ZIKV-F9-PL	1949	G	A	36541	32272	27.0025	26.7105	26.8565	GGG	G	GGA	G	E	324	0	0	0
ZIKV-F9-PL	3282	A	G	12153	4246	77.9314	67.7343	72.8329	AAA	K	GAA	E	NS1	265	0.018	0.102	0.06
ZIKV-F9-PL	4778	A	G	12445	8458	14.0056	4.87113	9.43837	GGA	G	GGG	G	NS3	55	0.185897	0.0582751	0.125
ZIKV-F11-PL	1060	G	A	6776	7232	5.31287	4.77046	5.04167	GGA	G	GAA	E	E	28	0.0135108	0.0244918	0.015
ZIKV-F11-PL	1106	A	G	6604	7048	16.4597	14.6708	15.5652	ATA	I	ATG	M	E	43	0	0	0
ZIKV-F11-PL	1611	T	A	16768	17798	54.5742	56.5625	55.5684	TTG	L	ATG	M	E	212	0	0	0
ZIKV-F11-PL	2072	C	T	17967	15902	5.44888	5.38297	5.41592	ATC	I	ATT	I	E	365	0	0	0
ZIKV-F11-PL	3282	A	G	8422	7735	99.9525	99.9612	99.9569	AAA	K	GAA	E	NS1	265	0.0177925	0.101454	0.06
ZIKV-F11-PL	3984	A	G	23712	25123	4.81613	4.86805	4.84209	ACT	T	GCT	A	NS2A	147	0.0139821	0.0132459	0.01
ZIKV-F11-PL	4130	A	G	6884	9044	3.16676	3.74834	3.45755	TTA	L	TTG	L	NS2A	195	0	0	0
ZIKV-F11-PL	4928	A	C	11058	12721	6.09513	5.98223	6.03868	AGA	R	AGC	S	NS3	105	0	0	0
ZIKV-F11-PL	5582	T	C	10071	8320	8.33085	7.19952	7.76518	CGT	R	CGC	R	NS3	323	0.0113334	0.0239636	0.015
ZIKV-F11-PL	7058	T	C	18218	18149	5.08289	5.22894	5.15592	ACT	T	ACC	T	NS4B	48	0	0	0
ZIKV-F11-PL	8013	G	A	3341	3376	14.337	15.4621	14.8996	GTG	V	ATG	M	NS5	116	0.0479693	0.0935454	0.07
ZIKV-F11-PL	8561	C	T	15167	14294	16.3645	15.44	15.9023	AAC	N	AAT	N	NS5	298	0.0130984	0.0207749	0.015
ZIKV-F12-PL	863	C	T	5844	5417	4.27789	4.41204	4.34497	TTC	F	TTT	F	pr-M	129	0	0	0
ZIKV-F12-PL	1238	C	T	2112	4675	17.7557	17.2193	17.4875	GAC	D	GAT	D	E	87	0	0	0
ZIKV-F12-PL	2321	T	C	4118	7284	4.95386	4.03624	4.49505	ATT	I	ATC	I	E	448	0	0	0
ZIKV-F12-PL	3282	A	G	3543	2595	99.9436	100	99.9718	AAA	K	GAA	E	NS1	265	0.0177925	0.101454	0.06
ZIKV-F12-PL	4308	G	A	23188	30963	4.27807	4.45047	4.36427	GCT	A	ACT	T	NS2B	29	0.0236289	0.0174718	0.02
ZIKV-F12-PL	6122	C	T	15554	24324	36.3251	36.6223	36.4737	CTC	L	CTT	L	NS3	503	0.034901	0.0236518	0.025
ZIKV-F12-PL	6344	G	A	7618	7769	4.41061	4.31201	4.36131	CCG	P	CCA	P	NS3	577	0	0	0
ZIKV-F12-PL	7486	G	A	7938	10473	4.61073	4.90786	4.75929	GGG	G	GAG	E	NS4B	191	0	0	0
ZIKV-F12-PL	9329	C	T	7145	9755	99.916	99.8565	99.8863	ATC	I	ATT	I	NS5	554	0	0	0
ZIKV-F12-PL	10633	A	G	621	779	23.0274	31.1938	27.1106	NA	NA	NA	NA	3'UTR	NA	0	0	0
ZIKV-F15-PL	3282	A	G	11348	3747	99.9471	100	99.9736	AAA	K	GAA	E	NS1	265	0.0177925	0.101454	0.06
ZIKV-F15-PL	8708	C	T	9880	7465	99.9393	95.1775	97.5584	ACC	T	ACT	T	NS5	347	0.0125857	0.0191461	0.015
ZIKV-F11-LN	2072	C	T	26270	33128	57.7693	42.6739	50.2216	ATC	I	ATT	I	E	365	0	0	0
ZIKV-F11-LN	3282	A	G	9197	6485	96.999	88.5736	92.7863	AAA	K	GAA	E	NS1	265	0.0177925	0.101454	0.06
ZIKV-F12-LN*	3282	A	G	2	784	50	100	75	AAA	K	GAA	E	NS1	265
*The sequencing depth threshold for samples to be included into single nucleotide variation analysis is 400 nucleotides; samples with the sequencing deapth lowever than 400 ucleotides in one replicate were excluded from SNV analysis
C: Capsid protein
pr-M: precursor membrane protein
E: envelope protein
NS1: nonstructural protein 1
NS2A: nonstructural protein 2A
NS2B: nonstructural protein 2B
NS3: nonstructural protein 3
NS4B: nonstructural protein 4B
NS5: nonstructural protein 5
UTR: Untranslated region
**To further confirm that in utero-emerged iSNVs are not virus stock-derived artifacts, we called variants in the ZIKV stock sequences with the very low 0.01% frequency threshold, and compared low-frequency stock-specific SNVs to in utero-emerged iSNVs.

## Sheet: PCV2
Table S4 - ZIKV SNVs
Supplementary Table S4 - PCV2 SNVs
Sample ID	Position in the PCV2 genome (nt #)	Reference nucleotide	Emerged nucleotide	Depth in replicate a (nt)	Depth in replicate b (nt)	Frequency of the nucleotides in replicate a (%)	Frequency of the nucleotides in replicate b (%)	Mean frequency (%)	Reference codon	Reference amino acid	Emerged codon	Emerged amino acid	PCV2 protein	Position of the amino acid in the specific protein (aa #)	Low-threshold SNV analysis (%; replicate a)*	Low-threshold SNV analysis (%; replicate b)*	Mean low-threshold SNV analysis (%)*
PCV2-F10-HE	1020	T	G	33191	80868	3.86	4.12	3.99	NA	NA	NA	NA	UTR	NA	0	0	0
PCV2-F10-SP	1009	C	T	51879	155392	8.15	8.92	8.54	NA	NA	NA	NA	UTR	NA	1.23082	1.27053	1.25067
PCV2-F11-BL	947	C	T	131574	15256	3.33	3.76	3.55	GTC	V	GTT	V	Rep	299	0.0453104	0.066912	0.0561112
PCV2-F12-BL	1517	C	T	175773	107970	3.56	3.47	3.52	TCT	R	TTT	K	Cap	73	0.0338191	0.022981	0.0284
PCV2-F13-SP	1009	C	G	54572	74347	4.4	3.93	4.17	NA	NA	NA	NA	UTR	NA	0.241378	0.161636	0.201507
PCV2-F13-SP	1009	C	T	54572	74347	13.31	11.66	12.49	NA	NA	NA	NA	UTR	NA	1.23082	1.27053	1.25067
The sequencing depth threshold for samples to be included into single nucleotide variation analysis is 400 nucleotides
SNV: single nucleotide polymorphism
Rep: Replication-associated protein (ORF1)
Cap: Capsid protein (ORF2)
UTR: Untranslated region
*To further confirm that in utero-emerged iSNVs are not virus stock-derived artifacts, we called variants in the PCV2 stock sequences with the very low 0.01% frequency threshold, and compared low-frequency stock-specific SNVs to in utero-emerged iSNVs.
