# Supplementary material for: The Isolated in Utero Environment Is Conducive to the Emergence of RNA and DNA Virus Variants
Source: Viruses. 2021 Sep 14;13(9):1827. doi: 10.3390/v13091827 (PMC8473323; doi:10.3390/v13091827)
Supplement: Supplementary file 1 [file viruses-13-01827-s001.zip › Table S5 - NGS coverage gaps in the ZIKV genome.xlsx]

## Sheet: Gaps in ZIKV genome coverage 
Table S5 - NGS coverage gaps in the ZIKV genome
Gaps in ZIKV genome coverage of the virus stock and in vivo samples (nucleotide positions)
ZIKV-PF-Stock-a	ZIKV-PF-Stock-b		ZIKV-F9-PL-a	ZIKV-F9-PL-b
from 1 to 37	from 1 to 37		from 1 to 37	from 1 to 37
from 5308 to 5483	from 5308 to 5483		from 5308 to 5483	from 5308 to 5483
from 6459 to 6695	from 6459 to 6695		from 6459 to 6695	from 6459 to 6695
from 10392 to 10807	from 10392 to 10807		from 10392 to 10807	from 10392 to 10807
			from 960 to 1000	from 797 to 1000
ZIKV-PF-Stock-a	ZIKV-PF-Stock-b		ZIKV-F11-PL-a	ZIKV-F11-PL-b
from 1 to 37	from 1 to 37		from 1 to 37	from 1 to 37
from 5308 to 5483	from 5308 to 5483			from 5308 to 5483
from 6459 to 6695	from 6459 to 6695			from 6459 to 6695
from 10392 to 10807	from 10392 to 10807		from 10392 to 10807	from 10392 to 10807
ZIKV-PF-Stock-a	ZIKV-PF-Stock-b		ZIKV-F12-PL-a	ZIKV-F12-PL-b
from 1 to 37	from 1 to 37		from 1 to 37	from 1 to 37
from 5308 to 5483	from 5308 to 5483
from 6459 to 6695	from 6459 to 6695
from 10392 to 10807	from 10392 to 10807		from 10648 to 10807	from 10648 to 10807
ZIKV-PF-Stock-a	ZIKV-PF-Stock-b		ZIKV-F15-PL-a	ZIKV-F15-PL-b
from 1 to 37	from 1 to 37		from 1 to 37	from 1 to 37
from 5308 to 5483	from 5308 to 5483		from 5308 to 5483	from 5308 to 5483
from 6459 to 6695	from 6459 to 6695		from 6459 to 6695	from 6459 to 6695
from 10392 to 10807	from 10392 to 10807		from 10392 to 10807	from 10392 to 10807
				from 960 to 1000
ZIKV-PF-Stock-a	ZIKV-PF-Stock-b		ZIKV-F11-LN-a	ZIKV-F11-LN-b
from 1 to 37	from 1 to 37		from 1 to 37	from 1 to 37
from 5308 to 5483	from 5308 to 5483		from 4966 to 5483	from 4966 to 5483
from 6459 to 6695	from 6459 to 6695		from 6459 to 6695	from 6459 to 6695
from 10392 to 10807	from 10392 to 10807		from 10392 to 10807	from 10392 to 10807
