# Supplementary material for: The Isolated in Utero Environment Is Conducive to the Emergence of RNA and DNA Virus Variants
Source: Viruses. 2021 Sep 14;13(9):1827. doi: 10.3390/v13091827 (PMC8473323; doi:10.3390/v13091827)
Supplement: Supplementary file 1 [file viruses-13-01827-s001.zip › Table S6 - In utero-emerged ZIKV and PCV2 iSNVs previously reported in field samples.xlsx]

## Sheet: ZIKV SNVs
Table S6 - In utero-emerged ZIKV iSNVs previously reported in field samples
Reference	Geographic region	Source of ZIKV sequences	Year of sampling	Strain / isolate	GenBank accession number	ZIKV SNVs emerged in utero	ZIKV genomic region
NA	Colombia	NA	2018	459148_Meta_Colombia_2016	MH544701.2	A3282G	NS1
NA	Brazil	Human	2016	Brazil/2016/INMI1	KU991811.1	A3282G	NS1
NA	NA	Human	2016	ZIKV/VR10599/Pavia/2016	KY003154.1	A3282G	NS1
NA	NA	Mosquitoes	2016	ZIKV/Aedes.sp/MEX/MEX_2-81/2016	KX446950.2	A3282G	NS1
https://www.ncbi.nlm.nih.gov/biosample/SAMN07796341	Puerto Rico	Human	2015	Zika virus/H.sapiens-tc/Puerto Rico/2015/PRVABC59	MK028857.1	A3282G	NS1
https://www.ncbi.nlm.nih.gov/genomes/VirusVariation/Database/nph-select.cgi?aln_type=P&cmd=show_query&country=any&fgenomeregion=12&genregion=NS5&go=database&host=any&isolation=any&orderby=collection_date%20desc&prev_cmd=show_query&searchin=sequence&sequence=P&srcfilter_labs=include&taxid=64320&tgenomeregion=12&view=P	Colombia	Human	2015	ZIKV/Homo sapiens/COL/FLR_00023/2015	MF574566.1	A4778G	NS3
NA	New Caledonia	NA	2014	NC14-17042014-4554	KM212964.1	A1106G	E
NA	NA	NA	2020	PR/DB-ZIKV093/2016	MW122379.1	A1106G	E
https://www.european-virus-archive.com/virus/zika-virus-80016	Brazil	Human	2016	800/16	MT483911.1	C2072T	E
https://www.ncbi.nlm.nih.gov/genomes/VirusVariation/Database/nph-select.cgi?aln_type=P&cmd=show_query&country=any&fgenomeregion=12&genregion=NS5&go=database&host=any&isolation=any&orderby=collection_date%20desc&prev_cmd=show_query&searchin=sequence&sequence=P&srcfilter_labs=include&taxid=64320&tgenomeregion=12&view=P	Mexico	Human	2016	mex07/Mexico/2016	KY606272.1	C2072T	E
NA	NA	NA	2016	PR/DB-ZIKV266/2016	MW122388.1	A4130G	NS2A
https://www.ncbi.nlm.nih.gov/genomes/VirusVariation/Database/nph-select.cgi?aln_type=P&cmd=show_query&country=any&fgenomeregion=12&genregion=NS5&go=database&host=any&isolation=any&orderby=collection_date%20desc&prev_cmd=show_query&searchin=sequence&sequence=P&srcfilter_labs=include&taxid=64320&tgenomeregion=12&view=P	Mexico	Human	2016	Mex03/Mexico/2016	KY606271.1	A4130G	NS2A
https://www.ncbi.nlm.nih.gov/biosample?term=txid64320[orgn]%20AND%20%22isolate%20Zika+virus%2FH+sapiens-wt%2FBRA%2F2016%2FFC-DQ107D1-URI%22[All%20Fields]	Brazil	Human	2016	Zika virus/H.sapiens-wt/BRA/2016/FC-DQ107D1-URI	KY014301.2	A4130G	NS2A
https://www.ncbi.nlm.nih.gov/genomes/VirusVariation/Database/nph-select.cgi?aln_type=P&cmd=show_query&country=any&fgenomeregion=12&genregion=NS5&go=database&host=any&isolation=any&orderby=collection_date%20desc&prev_cmd=show_query&searchin=sequence&sequence=P&srcfilter_labs=include&taxid=64320&tgenomeregion=12&view=P	Honduras	Human	2016	ZIKV/Homo sapiens/HND/2016/Honduras-1031	MF801384.1	A4130G	NS2A
https://www.ncbi.nlm.nih.gov/genomes/VirusVariation/Database/nph-select.cgi?aln_type=P&cmd=show_query&country=any&fgenomeregion=12&genregion=NS5&go=database&host=any&isolation=any&orderby=collection_date%20desc&prev_cmd=show_query&searchin=sequence&sequence=P&srcfilter_labs=include&taxid=64320&tgenomeregion=12&view=P	Honduras	Human	2016	ZIKV/Homo sapiens/HND/2016/Honduras-1083	MF801386.1	A4130G	NS2A
https://www.ncbi.nlm.nih.gov/genomes/VirusVariation/Database/nph-select.cgi?aln_type=P&cmd=show_query&country=any&fgenomeregion=12&genregion=NS5&go=database&host=any&isolation=any&orderby=collection_date%20desc&prev_cmd=show_query&searchin=sequence&sequence=P&srcfilter_labs=include&taxid=64320&tgenomeregion=12&view=P	Mexico	Human	2016	ZIKV/Homo sapiens/MEX/2016/mex26	MF801404.1	A4130G	NS2A
https://www.viprbrc.org/brc/viprStrainDetails.spg?ncbiAccession=MW122390&decorator=flavi_zika	Puerto Rico	Human	2016	PR/DB-ZIKV270/2016	MW122390.1	T5582C	NS3
https://www.viprbrc.org/brc/viprStrainDetails.spg?ncbiAccession=MW122425&decorator=flavi_zika&context=1611676670431	Puerto Rico	Human	2016	PR/DB-ZIKV778/2016	MW122425.1	T7058C	NS4B
Pettersson et al. mBio . 2016. doi: 10.1128/mBio.01239-16. https://www.viprbrc.org/brc/viprStrainDetails.spg?ncbiAccession=KX447517&decorator=flavi_zika&context=1611676735243	French Polynesia	Human	2014	1_0038_PF	KX447517.1	T7058C	NS4B
https://www.viprbrc.org/brc/viprStrainDetails.spg?ncbiAccession=KY785437&decorator=flavi_zika&context=1611676847622 Metsky et al. Nature. 2017. doi: 10.1038/nature22402.	Brazil	Human	2016	Zika virus/H.sapiens-wt/BRA/2016/FC-DQ5D1-URI	KY785437.1	T7058C	NS4B
https://www.viprbrc.org/brc/viprStrainDetails.spg?ncbiAccession=KY765324&decorator=flavi_zika&context=1611671178977	Nicaragua	Human	2016	ZIKV/Homo sapiens/NIC/8610_13A1/2016	KY765324.1	T7058C	NS4B
https://www.viprbrc.org/brc/viprStrainDetails.spg?ncbiAccession=KY559020&decorator=flavi_zika&context=1611671304874	Brazil	Human	2016	ZIKV/Homo_sapiens/Brazil/2016/ZBRX106	KY559020.1	T7058C	NS4B
https://www.viprbrc.org/brc/viprStrainDetails.spg?ncbiAccession=KY559027&decorator=flavi_zika&context=1611671418777	Brazil	Human	2016	ZIKV/Homo_sapiens/Brazil/2016/ZBRY6	KY559027.1	T7058C	NS4B
https://www.viprbrc.org/brc/viprDetails.spg?ncbiProteinId=VIPR_ALG4_AZS35338_1_56_421&decorator=flavi_zika&context=1597510480145	Brazil	Human	2016	AMA6	MK216691.1	T7058C	NS4B
https://www.viprbrc.org/brc/viprStrainDetails.spg?ncbiAccession=KY075935&decorator=flavi_zika&context=1611671862128 Grubaugh et al. Nature. 2017. doi: 10.1038/nature22400.	USA	Human	2016	ZIKV/Homo_sapiens/USA/2016/FL022U	KY075935.1	C8561T	NS5
https://www.viprbrc.org/brc/viprStrainDetails.spg?ncbiAccession=KY785412&decorator=flavi_zika&context=1611676993704 Metsky et al. Nature. 2017. doi: 10.1038/nature22402.	USA	Human	2016	Zika virus/H.sapiens-wt/USA/2016/FL-022-URI	KY785412.1	C8561T	NS5
https://www.ncbi.nlm.nih.gov/genomes/VirusVariation/Database/nph-select.cgi?aln_type=P&cmd=show_query&country=any&fgenomeregion=12&genregion=NS5&go=database&host=any&isolation=any&orderby=collection_date%20desc&prev_cmd=show_query&searchin=sequence&sequence=P&srcfilter_labs=include&taxid=64320&tgenomeregion=12&view=P	Brazil	Human	2015	BeH815744	KU365780.1	C863T	pr-M
https://www.ncbi.nlm.nih.gov/genomes/VirusVariation/Database/nph-select.cgi?aln_type=P&cmd=show_query&country=any&fgenomeregion=12&genregion=NS5&go=database&host=any&isolation=any&orderby=collection_date%20desc&prev_cmd=show_query&searchin=sequence&sequence=P&srcfilter_labs=include&taxid=64320&tgenomeregion=12&view=P	Brazil	Human	2015	BeH818995	KU365777.1	C863T	pr-M
https://www.viprbrc.org/brc/viprStrainDetails.spg?ncbiAccession=KX813683&decorator=flavi_zika&context=1614733464377	Singapore	Human	2016	ZKA-16-097	KX813683.1	C1238T	E
https://www.viprbrc.org/brc/viprStrainDetails.spg?ncbiAccession=KX827309&decorator=flavi_zika&context=1614733603579	Singapore	Human	2016	ZKA-16-291	KX827309.1	C1238T	E
https://www.viprbrc.org/brc/viprStrainDetails.spg?ncbiAccession=KY921911&decorator=flavi_zika&context=1614733728964	Singapore	Human	2016	9410	KY921911.1	C1238T	E
https://www.viprbrc.org/brc/viprStrainDetails.spg?ncbiAccession=KY241671&decorator=flavi_zika&context=1614734028055	Singapore	Human	2016	ZIKV-SG-001	KY241671.1	C1238T	E
https://www.viprbrc.org/brc/viprStrainDetails.spg?ncbiAccession=KY241673&decorator=flavi_zika&context=1614734127991	Singapore	Human	2016	ZIKV-SG-003	KY241673.1	C1238T	E
https://www.viprbrc.org/brc/viprStrainDetails.spg?ncbiAccession=KY241674&decorator=flavi_zika&context=1614734283869	Singapore	Human	2016	ZIKV-SG-004	KY241674.1	C1238T	E
https://www.viprbrc.org/brc/viprStrainDetails.spg?ncbiAccession=KY241675&decorator=flavi_zika&context=1614779603627	Singapore	Human	2016	ZIKV-SG-005	KY241675.1	C1238T	E
https://www.viprbrc.org/brc/viprStrainDetails.spg?ncbiAccession=KY241676&decorator=flavi_zika&context=1614779685634	Singapore	Human	2016	ZIKV-SG-006	KY241676.1	C1238T	E
https://www.viprbrc.org/brc/viprStrainDetails.spg?ncbiAccession=KY241677&decorator=flavi_zika&context=1614779753384	Singapore	Human	2016	ZIKV-SG-007	KY241677.1	C1238T	E
https://www.viprbrc.org/brc/viprStrainDetails.spg?ncbiAccession=KY241678&decorator=flavi_zika&context=1614779826629	Singapore	Human	2016	ZIKV-SG-008	KY241678.1	C1238T	E
https://www.viprbrc.org/brc/viprStrainDetails.spg?ncbiAccession=KY241679&decorator=flavi_zika&context=1614779893524	Singapore	Human	2016	ZIKV-SG-009	KY241679.1	C1238T	E
https://www.viprbrc.org/brc/viprStrainDetails.spg?ncbiAccession=KY241680&decorator=flavi_zika&context=1614779958517	Singapore	Human	2016	ZIKV-SG-010	KY241680.1	C1238T	E
https://www.viprbrc.org/brc/viprStrainDetails.spg?ncbiAccession=KY241681&decorator=flavi_zika&context=1614780039142	Singapore	Human	2016	ZIKV-SG-011	KY241681.1	C1238T	E
https://www.viprbrc.org/brc/viprStrainDetails.spg?ncbiAccession=KY241682&decorator=flavi_zika&context=1614780108306	Singapore	Human	2016	ZIKV-SG-012	KY241682.1	C1238T	E
https://www.viprbrc.org/brc/viprStrainDetails.spg?ncbiAccession=KY241683&decorator=flavi_zika&context=1614784387358	Singapore	Human	2016	ZIKV-SG-013	KY241683.1	C1238T	E
https://www.viprbrc.org/brc/viprStrainDetails.spg?ncbiAccession=KY241685&decorator=flavi_zika&context=1614875241581	Singapore	Human	2016	ZIKV-SG-015	KY241685.1	C1238T	E
https://www.viprbrc.org/brc/viprStrainDetails.spg?ncbiAccession=KY241686&decorator=flavi_zika&context=1614875691271	Singapore	Human	2016	ZIKV-SG-016	KY241686.1	C1238T	E
https://www.viprbrc.org/brc/viprStrainDetails.spg?ncbiAccession=KY241687&decorator=flavi_zika&context=1614875809837	Singapore	Human	2016	ZIKV-SG-017	KY241687.1	C1238T	E
https://www.viprbrc.org/brc/viprStrainDetails.spg?ncbiAccession=KY241688&decorator=flavi_zika&context=1614875964204	Singapore	Human	2016	ZIKV-SG-018	KY241688.1	C1238T	E
https://www.viprbrc.org/brc/viprStrainDetails.spg?ncbiAccession=KY241689&decorator=flavi_zika&context=1614876082047	Singapore	Human	2016	ZIKV-SG-019	KY241689.1	C1238T	E
https://www.viprbrc.org/brc/viprStrainDetails.spg?ncbiAccession=KY241690&decorator=flavi_zika&context=1614876175874	Singapore	Human	2016	ZIKV-SG-020	KY241690.1	C1238T	E
https://www.viprbrc.org/brc/viprStrainDetails.spg?ncbiAccession=KY241691&decorator=flavi_zika&context=1614877001550	Singapore	Human	2016	ZIKV-SG-021	KY241691.1	C1238T	E
https://www.viprbrc.org/brc/viprStrainDetails.spg?ncbiAccession=KY241692&decorator=flavi_zika&context=1614877173140	Singapore	Human	2016	ZIKV-SG-022	KY241692.1	C1238T	E
https://www.viprbrc.org/brc/viprStrainDetails.spg?ncbiAccession=KY241693&decorator=flavi_zika&context=1614877367836	Singapore	Human	2016	ZIKV-SG-023	KY241693.1	C1238T	E
https://www.viprbrc.org/brc/viprStrainDetails.spg?ncbiAccession=KY241694&decorator=flavi_zika&context=1614877464005	Singapore	Human	2016	ZIKV-SG-024	KY241694.1	C1238T	E
https://www.viprbrc.org/brc/viprStrainDetails.spg?ncbiAccession=KY241695&decorator=flavi_zika&context=1614877587388	Singapore	Human	2016	ZIKV-SG-025	KY241695.1	C1238T	E
https://www.viprbrc.org/brc/viprStrainDetails.spg?ncbiAccession=KY241696&decorator=flavi_zika&context=1614877726097	Singapore	Human	2016	ZIKV-SG-026	KY241696.1	C1238T	E
https://www.viprbrc.org/brc/viprStrainDetails.spg?ncbiAccession=KY241697&decorator=flavi_zika&context=1614877880494	Singapore	Human	2016	ZIKV-SG-027	KY241697.1	C1238T	E
https://www.viprbrc.org/brc/viprStrainDetails.spg?ncbiAccession=KY241698&decorator=flavi_zika&context=1614878131856	Singapore	Human	2016	ZIKV-SG-028	KY241698.1	C1238T	E
https://www.viprbrc.org/brc/viprStrainDetails.spg?ncbiAccession=KY241699&decorator=flavi_zika&context=1614878222696	Singapore	Human	2016	ZIKV-SG-029	KY241699.1	C1238T	E
https://www.viprbrc.org/brc/viprStrainDetails.spg?ncbiAccession=KY241700&decorator=flavi_zika&context=1614878311248	Singapore	Human	2016	ZIKV-SG-030	KY241700.1	C1238T	E
https://www.viprbrc.org/brc/viprStrainDetails.spg?ncbiAccession=KY241701&decorator=flavi_zika&context=1614878426350	Singapore	Human	2016	ZIKV-SG-031	KY241701.1	C1238T	E
https://www.viprbrc.org/brc/viprStrainDetails.spg?ncbiAccession=KY241703&decorator=flavi_zika&context=1614878532012	Singapore	Human	2016	ZIKV-SG-033	KY241703.1	C1238T	E
https://www.viprbrc.org/brc/viprStrainDetails.spg?ncbiAccession=KY241704&decorator=flavi_zika&context=1614878653250	Singapore	Human	2016	ZIKV-SG-034	KY241704.1	C1238T	E
https://www.viprbrc.org/brc/viprStrainDetails.spg?ncbiAccession=KY241706&decorator=flavi_zika&context=1614878737327	Singapore	Human	2016	ZIKV-SG-036	KY241706.1	C1238T	E
https://www.viprbrc.org/brc/viprStrainDetails.spg?ncbiAccession=KY241707&decorator=flavi_zika&context=1614878906697	Singapore	Human	2016	ZIKV-SG-037	KY241707.1	C1238T	E
https://www.viprbrc.org/brc/viprStrainDetails.spg?ncbiAccession=KY241708&decorator=flavi_zika&context=1614878981990	Singapore	Human	2016	ZIKV-SG-038	KY241708.1	C1238T	E
https://www.viprbrc.org/brc/viprStrainDetails.spg?ncbiAccession=KY241711&decorator=flavi_zika&context=1614879109354	Singapore	Human	2016	ZIKV-SG-041	KY241711.1	C1238T	E
https://www.viprbrc.org/brc/viprStrainDetails.spg?ncbiAccession=KY241712&decorator=flavi_zika&context=1614879205250	Singapore	Human	2016	ZIKV-SG-042	KY241712.1	C1238T	E
https://www.viprbrc.org/brc/viprStrainDetails.spg?ncbiAccession=KY241713&decorator=flavi_zika&context=1614879304927	Singapore	Human	2016	ZIKV-SG-043	KY241713.1	C1238T	E
https://www.viprbrc.org/brc/viprStrainDetails.spg?ncbiAccession=KY241714&decorator=flavi_zika&context=1614879445202	Singapore	Human	2016	ZIKV-SG-044	KY241714.1	C1238T	E
https://www.viprbrc.org/brc/viprStrainDetails.spg?ncbiAccession=KY241716&decorator=flavi_zika&context=1614879530853	Singapore	Human	2016	ZIKV-SG-046	KY241716.1	C1238T	E
https://www.viprbrc.org/brc/viprStrainDetails.spg?ncbiAccession=KY241717&decorator=flavi_zika&context=1614879672415	Singapore	Human	2016	ZIKV-SG-047	KY241717.1	C1238T	E
https://www.viprbrc.org/brc/viprStrainDetails.spg?ncbiAccession=KY241719&decorator=flavi_zika&context=1614879767321	Singapore	Human	2016	ZIKV-SG-049	KY241719.1	C1238T	E
https://www.viprbrc.org/brc/viprStrainDetails.spg?ncbiAccession=KY241720&decorator=flavi_zika&context=1614879858968	Singapore	Human	2016	ZIKV-SG-050	KY241720.1	C1238T	E
https://www.viprbrc.org/brc/viprStrainDetails.spg?ncbiAccession=KY241721&decorator=flavi_zika&context=1614879932902	Singapore	Human	2016	ZIKV-SG-051	KY241721.1	C1238T	E
https://www.viprbrc.org/brc/viprStrainDetails.spg?ncbiAccession=KY241722&decorator=flavi_zika&context=1614880021244	Singapore	Human	2016	ZIKV-SG-052	KY241722.1	C1238T	E
https://www.viprbrc.org/brc/viprStrainDetails.spg?ncbiAccession=KY241725&decorator=flavi_zika&context=1614880118812	Singapore	Human	2016	ZIKV-SG-055	KY241725.1	C1238T	E
https://www.viprbrc.org/brc/viprStrainDetails.spg?ncbiAccession=KY241726&decorator=flavi_zika&context=1614880259729	Singapore	Human	2016	ZIKV-SG-056	KY241726.1	C1238T	E
https://www.viprbrc.org/brc/viprStrainDetails.spg?ncbiAccession=KY241727&decorator=flavi_zika&context=1614880313502	Singapore	Human	2016	ZIKV-SG-057	KY241727.1	C1238T	E
https://www.viprbrc.org/brc/viprStrainDetails.spg?ncbiAccession=KY241728&decorator=flavi_zika&context=1614880382210	Singapore	Human	2016	ZIKV-SG-058	KY241728.1	C1238T	E
https://www.viprbrc.org/brc/viprStrainDetails.spg?ncbiAccession=KY241729&decorator=flavi_zika&context=1614880430803	Singapore	Human	2016	ZIKV-SG-059	KY241729.1	C1238T	E
https://www.viprbrc.org/brc/viprStrainDetails.spg?ncbiAccession=KY241730&decorator=flavi_zika&context=1614880494211	Singapore	Human	2016	ZIKV-SG-060	KY241730.1	C1238T	E
https://www.viprbrc.org/brc/viprStrainDetails.spg?ncbiAccession=KY241733&decorator=flavi_zika&context=1614880565267	Singapore	Human	2016	ZIKV-SG-063	KY241733.1	C1238T	E
https://www.viprbrc.org/brc/viprStrainDetails.spg?ncbiAccession=KY241734&decorator=flavi_zika&context=1614880642930	Singapore	Human	2016	ZIKV-SG-064	KY241734.1	C1238T	E
https://www.viprbrc.org/brc/viprStrainDetails.spg?ncbiAccession=KY241736&decorator=flavi_zika&context=1614880736899	Singapore	Human	2016	ZIKV-SG-066	KY241736.1	C1238T	E
https://www.viprbrc.org/brc/viprStrainDetails.spg?ncbiAccession=KY241738&decorator=flavi_zika&context=1614880805852	Singapore	Human	2016	ZIKV-SG-068	KY241738.1	C1238T	E
https://www.viprbrc.org/brc/viprStrainDetails.spg?ncbiAccession=KY241740&decorator=flavi_zika&context=1614880888673	Singapore	Human	2016	ZIKV-SG-070	KY241740.1	C1238T	E
https://www.viprbrc.org/brc/viprStrainDetails.spg?ncbiAccession=KY241741&decorator=flavi_zika&context=1614880968621	Singapore	Human	2016	ZIKV-SG-071	KY241741.1	C1238T	E
https://www.viprbrc.org/brc/viprStrainDetails.spg?ncbiAccession=KY241744&decorator=flavi_zika&context=1614881352514	Singapore	Human	2016	ZIKV-SG-074	KY241744.1	C1238T	E
https://www.viprbrc.org/brc/viprStrainDetails.spg?ncbiAccession=KY241748&decorator=flavi_zika&context=1614881479667	Singapore	Human	2016	ZIKV-SG-078	KY241748.1	C1238T	E
https://www.viprbrc.org/brc/viprStrainDetails.spg?ncbiAccession=KY241749&decorator=flavi_zika&context=1614881570867	Singapore	Human	2016	ZIKV-SG-079	KY241749.1	C1238T	E
https://www.viprbrc.org/brc/viprStrainDetails.spg?ncbiAccession=KY241750&decorator=flavi_zika&context=1614881633562	Singapore	Human	2016	ZIKV-SG-080	KY241750.1	C1238T	E
https://www.viprbrc.org/brc/viprStrainDetails.spg?ncbiAccession=KY241751&decorator=flavi_zika&context=1614881686921	Singapore	Human	2016	ZIKV-SG-081	KY241751.1	C1238T	E
https://www.viprbrc.org/brc/viprStrainDetails.spg?ncbiAccession=KY241754&decorator=flavi_zika&context=1614881865362	Singapore	Human	2016	ZIKV-SG-084	KY241754.1	C1238T	E
https://www.viprbrc.org/brc/viprStrainDetails.spg?ncbiAccession=KY241756&decorator=flavi_zika&context=1614881958120	Singapore	Human	2016	ZIKV-SG-086	KY241756.1	C1238T	E
https://www.viprbrc.org/brc/viprStrainDetails.spg?ncbiAccession=KY241757&decorator=flavi_zika&context=1614882205954	Singapore	Human	2016	ZIKV-SG-087	KY241757.1	C1238T	E
https://www.viprbrc.org/brc/viprStrainDetails.spg?ncbiAccession=KY241758&decorator=flavi_zika&context=1614882645858	Singapore	Human	2016	ZIKV-SG-088	KY241758.1	C1238T	E
https://www.viprbrc.org/brc/viprStrainDetails.spg?ncbiAccession=KY241759&decorator=flavi_zika&context=1614882703486	Singapore	Human	2016	ZIKV-SG-089	KY241759.1	C1238T	E
https://www.viprbrc.org/brc/viprStrainDetails.spg?ncbiAccession=KY241766&decorator=flavi_zika&context=1614882912081	Singapore	Human	2016	ZIKV-SG-096	KY241766.1	C1238T	E
https://www.viprbrc.org/brc/viprStrainDetails.spg?ncbiAccession=KY241767&decorator=flavi_zika&context=1614883081082	Singapore	Human	2016	ZIKV-SG-097	KY241767.1	C1238T	E
https://www.viprbrc.org/brc/viprStrainDetails.spg?ncbiAccession=KY241769&decorator=flavi_zika&context=1614883152346	Singapore	Human	2016	ZIKV-SG-099	KY241769.1	C1238T	E
https://www.viprbrc.org/brc/viprStrainDetails.spg?ncbiAccession=KY241773&decorator=flavi_zika&context=1614883265861	Singapore	Human	2016	ZIKV-SG-103	KY241773.1	C1238T	E
https://www.viprbrc.org/brc/viprStrainDetails.spg?ncbiAccession=KY241776&decorator=flavi_zika&context=1614883387568	Singapore	Human	2016	ZIKV-SG-106	KY241776.1	C1238T	E
https://www.viprbrc.org/brc/viprStrainDetails.spg?ncbiAccession=KY241777&decorator=flavi_zika&context=1614883478740	Singapore	Human	2016	ZIKV-SG-107	KY241777.1	C1238T	E
https://www.viprbrc.org/brc/viprStrainDetails.spg?ncbiAccession=KY241778&decorator=flavi_zika&context=1614883569693	Singapore	Human	2016	ZIKV-SG-108	KY241778.1	C1238T	E
https://www.viprbrc.org/brc/viprStrainDetails.spg?ncbiAccession=KY241779&decorator=flavi_zika&context=1614883738675	Singapore	Human	2016	ZIKV-SG-109	KY241779.1	C1238T	E
https://www.viprbrc.org/brc/viprStrainDetails.spg?ncbiAccession=KY241780&decorator=flavi_zika&context=1614883810662	Singapore	Human	2016	ZIKV-SG-110	KY241780.1	C1238T	E
https://www.viprbrc.org/brc/viprStrainDetails.spg?ncbiAccession=KY241781&decorator=flavi_zika&context=1614883949113	Singapore	Human	2016	ZIKV-SG-111	KY241781.1	C1238T	E
https://www.viprbrc.org/brc/viprStrainDetails.spg?ncbiAccession=KY241782&decorator=flavi_zika&context=1614884029955	Singapore	Human	2016	ZIKV-SG-112	KY241782.1	C1238T	E
https://www.viprbrc.org/brc/viprStrainDetails.spg?ncbiAccession=KY241783&decorator=flavi_zika&context=1614884189774	Singapore	Human	2016	ZIKV-SG-113	KY241783.1	C1238T	E
https://www.viprbrc.org/brc/viprStrainDetails.spg?ncbiAccession=KY241785&decorator=flavi_zika&context=1614884259736	Singapore	Human	2016	ZIKV-SG-115	KY241785.1	C1238T	E
https://www.viprbrc.org/brc/viprStrainDetails.spg?ncbiAccession=KY241787&decorator=flavi_zika&context=1614884326748	Singapore	Human	2016	ZIKV-SG-117	KY241787.1	C1238T	E
https://www.viprbrc.org/brc/viprStrainDetails.spg?ncbiAccession=KY307811&decorator=flavi_zika&context=1614884403628	Brazil	Monkey	2016	bruspCE114_16	KY307811.1	C1238T	E
https://www.viprbrc.org/brc/viprStrainDetails.spg?ncbiAccession=MH255601&decorator=flavi_zika&context=1614780398511	Singapore	Human	2016	ZKA-16-922	MH255601.1	C1238T	E
https://www.viprbrc.org/brc/viprStrainDetails.spg?ncbiAccession=MG807646&decorator=flavi_zika&context=1614780595666	Thailand	Human	2016	SI-BKK05	MG807646.1	C1238T	E
https://www.viprbrc.org/brc/viprStrainDetails.spg?ncbiAccession=MK237995&decorator=flavi_zika&context=1614780203269	Thailand	Human	2017	BKK 2017Z-6	MK237995.1	C1238T	E
https://www.ncbi.nlm.nih.gov/genomes/VirusVariation/Database/nph-select.cgi?aln_type=P&cmd=show_query&country=any&fgenomeregion=12&genregion=NS5&go=database&host=any&isolation=any&orderby=collection_date%20desc&prev_cmd=show_query&searchin=sequence&sequence=P&srcfilter_labs=include&taxid=64320&tgenomeregion=12&view=P Enfissi et al. Lancet. 2016. doi: 10.1016/S0140-6736(16)00003-9.	Suriname	Human	2015	Z1106033	KU312312.1	T2321C	E
https://www.ncbi.nlm.nih.gov/genomes/VirusVariation/Database/nph-select.cgi?aln_type=P&cmd=show_query&country=any&fgenomeregion=12&genregion=NS5&go=database&host=any&isolation=any&orderby=collection_date%20desc&prev_cmd=show_query&searchin=sequence&sequence=P&srcfilter_labs=include&taxid=64320&tgenomeregion=12&view=P Yadav. et al. Infect Genet Evol . 2019. doi: 10.1016/j.meegid.2019.01.026.	India	Human	2018	17844	MK238035.1	C6122T	NS3
https://www.viprbrc.org/brc/viprStrainDetails.spg?ncbiAccession=KY785420&decorator=flavi_zika&context=1611676103393 Metsky et al. Nature. 2017. doi: 10.1038/nature22402.	Dominican Republic	Human	2016	Zika virus/H.sapiens-wt/DOM/2016/BB-0183-SER	KY785420.1	C6122T	NS3
https://www.viprbrc.org/brc/viprStrainDetails.spg?ncbiAccession=MK216693&decorator=flavi_zika&context=1611676334622	Brazil	Human	2016	AMA14	MK216693.1	G6344A	NS3
https://www.ncbi.nlm.nih.gov/genomes/VirusVariation/Database/nph-select.cgi?aln_type=P&cmd=show_query&country=any&fgenomeregion=12&genregion=NS5&go=database&host=any&isolation=any&orderby=collection_date%20desc&prev_cmd=show_query&searchin=sequence&sequence=P&srcfilter_labs=include&taxid=64320&tgenomeregion=12&view=P	Dominican Republic	Human	2016	Zika virus/H.sapiens-wt/DOM/2016/MA-WGS16-011-SER	KY785484.1	A10633G	3'UTR
https://www.viprbrc.org/brc/viprStrainDetails.spg?ncbiAccession=MF801406&decorator=flavi_zika&context=1614735435422	Mexico	Human	2016	ZIKV/Homo sapiens/MEX/2016/mex28	MF801406.1	A10633G	3'UTR
https://www.viprbrc.org/brc/viprStrainDetails.spg?ncbiAccession=MK216724&decorator=flavi_zika&context=1614735335928	Brazil	Human	2016	AMA59	MK216724.1	C8708T	NS5
https://www.viprbrc.org/brc/viprStrainDetails.spg?ncbiAccession=KF383054&decorator=flavi_zika&context=1614734537517	Senegal	Unknown	2001	ArD158084	KF383054.1	A10633G	3'UTR
https://www.viprbrc.org/brc/viprStrainDetails.spg?ncbiAccession=KF383071&decorator=flavi_zika&context=1614734836113	Cote dIvoire	Unknown	1999	ArA986	KF383071.1	A10633G	3'UTR
https://www.viprbrc.org/brc/viprStrainDetails.spg?ncbiAccession=KF383072&decorator=flavi_zika&context=1614734960881	Cote dIvoire	Unknown	1999	ArA982	KF383072.1	A10633G	3'UTR
NA: not available
SNV: single nucleotide polymorphism
UTR: untranslated region
pr-M: precursor membrane protein
E: envelope
NS1: nonstructural protein 1
NS2A: nonstructural protein 2A
NS3: nonstructural protein 3
NS4B: nonstructural protein 4B
NS5: nonstructural protein 5

## Sheet: PCV2 SNVs
Table S6 - In utero-emerged PCV2 iSNVs previously reported in field samples
Reference	Geographic region	Source of PCV2 sequences	Year of sampling	Strain	GenBank accession number	PCV2 SNVs emerged in utero	PCV2 genomic region
Dvorak et al. Vet Microbiol. 2013. doi: 10.1016/j.vetmic.2013.06.011.	USA; Minnesota or Iowa or Indiana	Environmental; bar surfaces	Before 2013	Farm5S2_Bar_D1	KC767250.1	C1517T	Cap
Yang et al. Transbound Emerg Dis . 2018. doi: 10.1111/tbed.12768.	China, Hebei	Clinical samples of diseasedand and healthy pigs	2013-2015	HB1301	KY940532.1	C947T	Rep
NA	China	NA	NA	HN-XY-2016	MG491307.1	C947T	Rep
Eddicks et al. Tierarztl Prax Ausg G Grosstiere Nutztiere . 2017. doi: 10.15653/TPG-160547.	Germany	Pig serum	Before 2017	DE85416-13	KY388476.1	C947T	Rep
Nugroho et al. International Journal of Advanced Veterinary Science and Technology 2016	Indonesia Jayawijaya region	Blood samples of village pigs	Before 2016	Papua 05	KT224515.1	C947T	Rep
NA	China	NA	NA	JZS7	KC821783.1	C947T	Rep
Franzo et al. Infect Genet Evol. 2015. doi: 10.1016/j.meegid.2015.04.004.	Italy	Pig tissues	2007-2014	2665/2012_Padova_14_21/12/2012	KP231117.1	C947T	Rep
NA	China, Anhui	NA	Before 2012	DY1101	JX406425.1	C947T	Rep
Xu et al. Journal of Virology. 2012. doi: 10.1128/JVI.02739-12	China, ShanDong	Tissues from pigs with postweaning multisystemic wasting syndrome	2005	ShanDong	DQ346683.1	C1009T	UTR
Cheung et al. 2007. doi: 10.1007/s00705-006-0909-6.	USA, Kansas	Pig lymph node	2005	k52	DQ629117.1	C1009T	UTR
Cheung et al. 2007. doi: 10.1007/s00705-006-0909-6.	USA, Iowa	Pig lymph node	2005	iB2	DQ629119.1	C1009T	UTR
NA	China	NA	NA	TS	DQ355153.1	C1009T	UTR
NA	China	NA	NA	DBN-08	FJ660969.1	C1009T	UTR
NA	China	NA	NA	SDrc-1b	FJ870975.1	C1009T	UTR
NA	China	NA	NA	YZ0901	GU252370.1	C1009T	UTR
NA	China	NA	NA	SDQD1809	MN482048.1	C1009T	UTR
NA	China	NA	NA	SDBG1108	KJ680348.1	C1009T	UTR
NA	China, Hunan	NA	NA	XQ12	KJ680364.1	C1009T	UTR
NA	China	NA	NA	GD005	KM487708.1	C1009T	UTR
NA	China	NA	NA	14SC02	KP975438.1	C1009T	UTR
NA	China	NA	NA	14HB0202	KP975444.1	C1009T	UTR
NA	China	NA	NA	14HB0102	KP975445.1	C1009T	UTR
NA	China	NA	NA	GSBY-13	KU193766.1	C1009T	UTR
NA	India, Mizoram	NA	NA	PCV2/MZ/IND/42	KX009481.1	C1009T	UTR
NA	China	NA	NA	GX230	KX929000.1	C1009T	UTR
NA	China	NA	NA	GX191	KX929005.1	C1009T	UTR
NA	China	NA	NA	GX135	KX929019.1	C1009T	UTR
NA	China	NA	NA	SMU-SC1	MF385005.1	C1009T	UTR
NA	India, Mizoram	NA	NA	PCV2/MZ/IND/124	MH379262.1	C1009T	UTR
NA	China	NA	2017	HN-ZM-2017	MK604515.1	C1009T	UTR
Wang et al. Transbound Emerg Dis . 2020. doi: 10.1111/tbed.13467.	USA	NA	2016-2018	KSU-KS-2017-PCV2-17	MK504397.1	C1009T	UTR
Wang et al. Transbound Emerg Dis . 2020. doi: 10.1111/tbed.13467.	USA	NA	2016-2018	KS-2016-PCV2-35	MK504413.1	C1009T	UTR
NA	China, Guangxi Zhuang Autonomous Region	NA	NA	PCV2/CH/GX/1960B/2018	MN170521.1	C1009T	UTR
NA	China	NA	NA	PCV2/CH/GX/2388B/2018	MN258748.1	C1009T	UTR
NA	China	NA	NA	PCV2/CH/GX/2393B/2018	MN258750.1	C1009T	UTR
NA	China	NA	NA	PCV2/CH/GX/2667B/2019	MN258761.1	C1009T	UTR
NA	China	NA	2008-2015	201101JS	KX904952.1	C1009G	UTR
NA	China	NA	Before 2007	Henan-1	EU346945.1	C1009G	UTR
NA: not available
SNV: single nucleotide polymorphism
UTR: untranslated region
Rep: replication-associated protein (ORF1)
Cap: capsid protein (ORF2)
