# Supplementary figures and images for: The Isolated in Utero Environment Is Conducive to the Emergence of RNA and DNA Virus Variants
Source: MDPI journal article supplement (doi:10.3390/v13091827), 2021-09-14

Figure S2. Porcine circovirus 2 NGS coverage

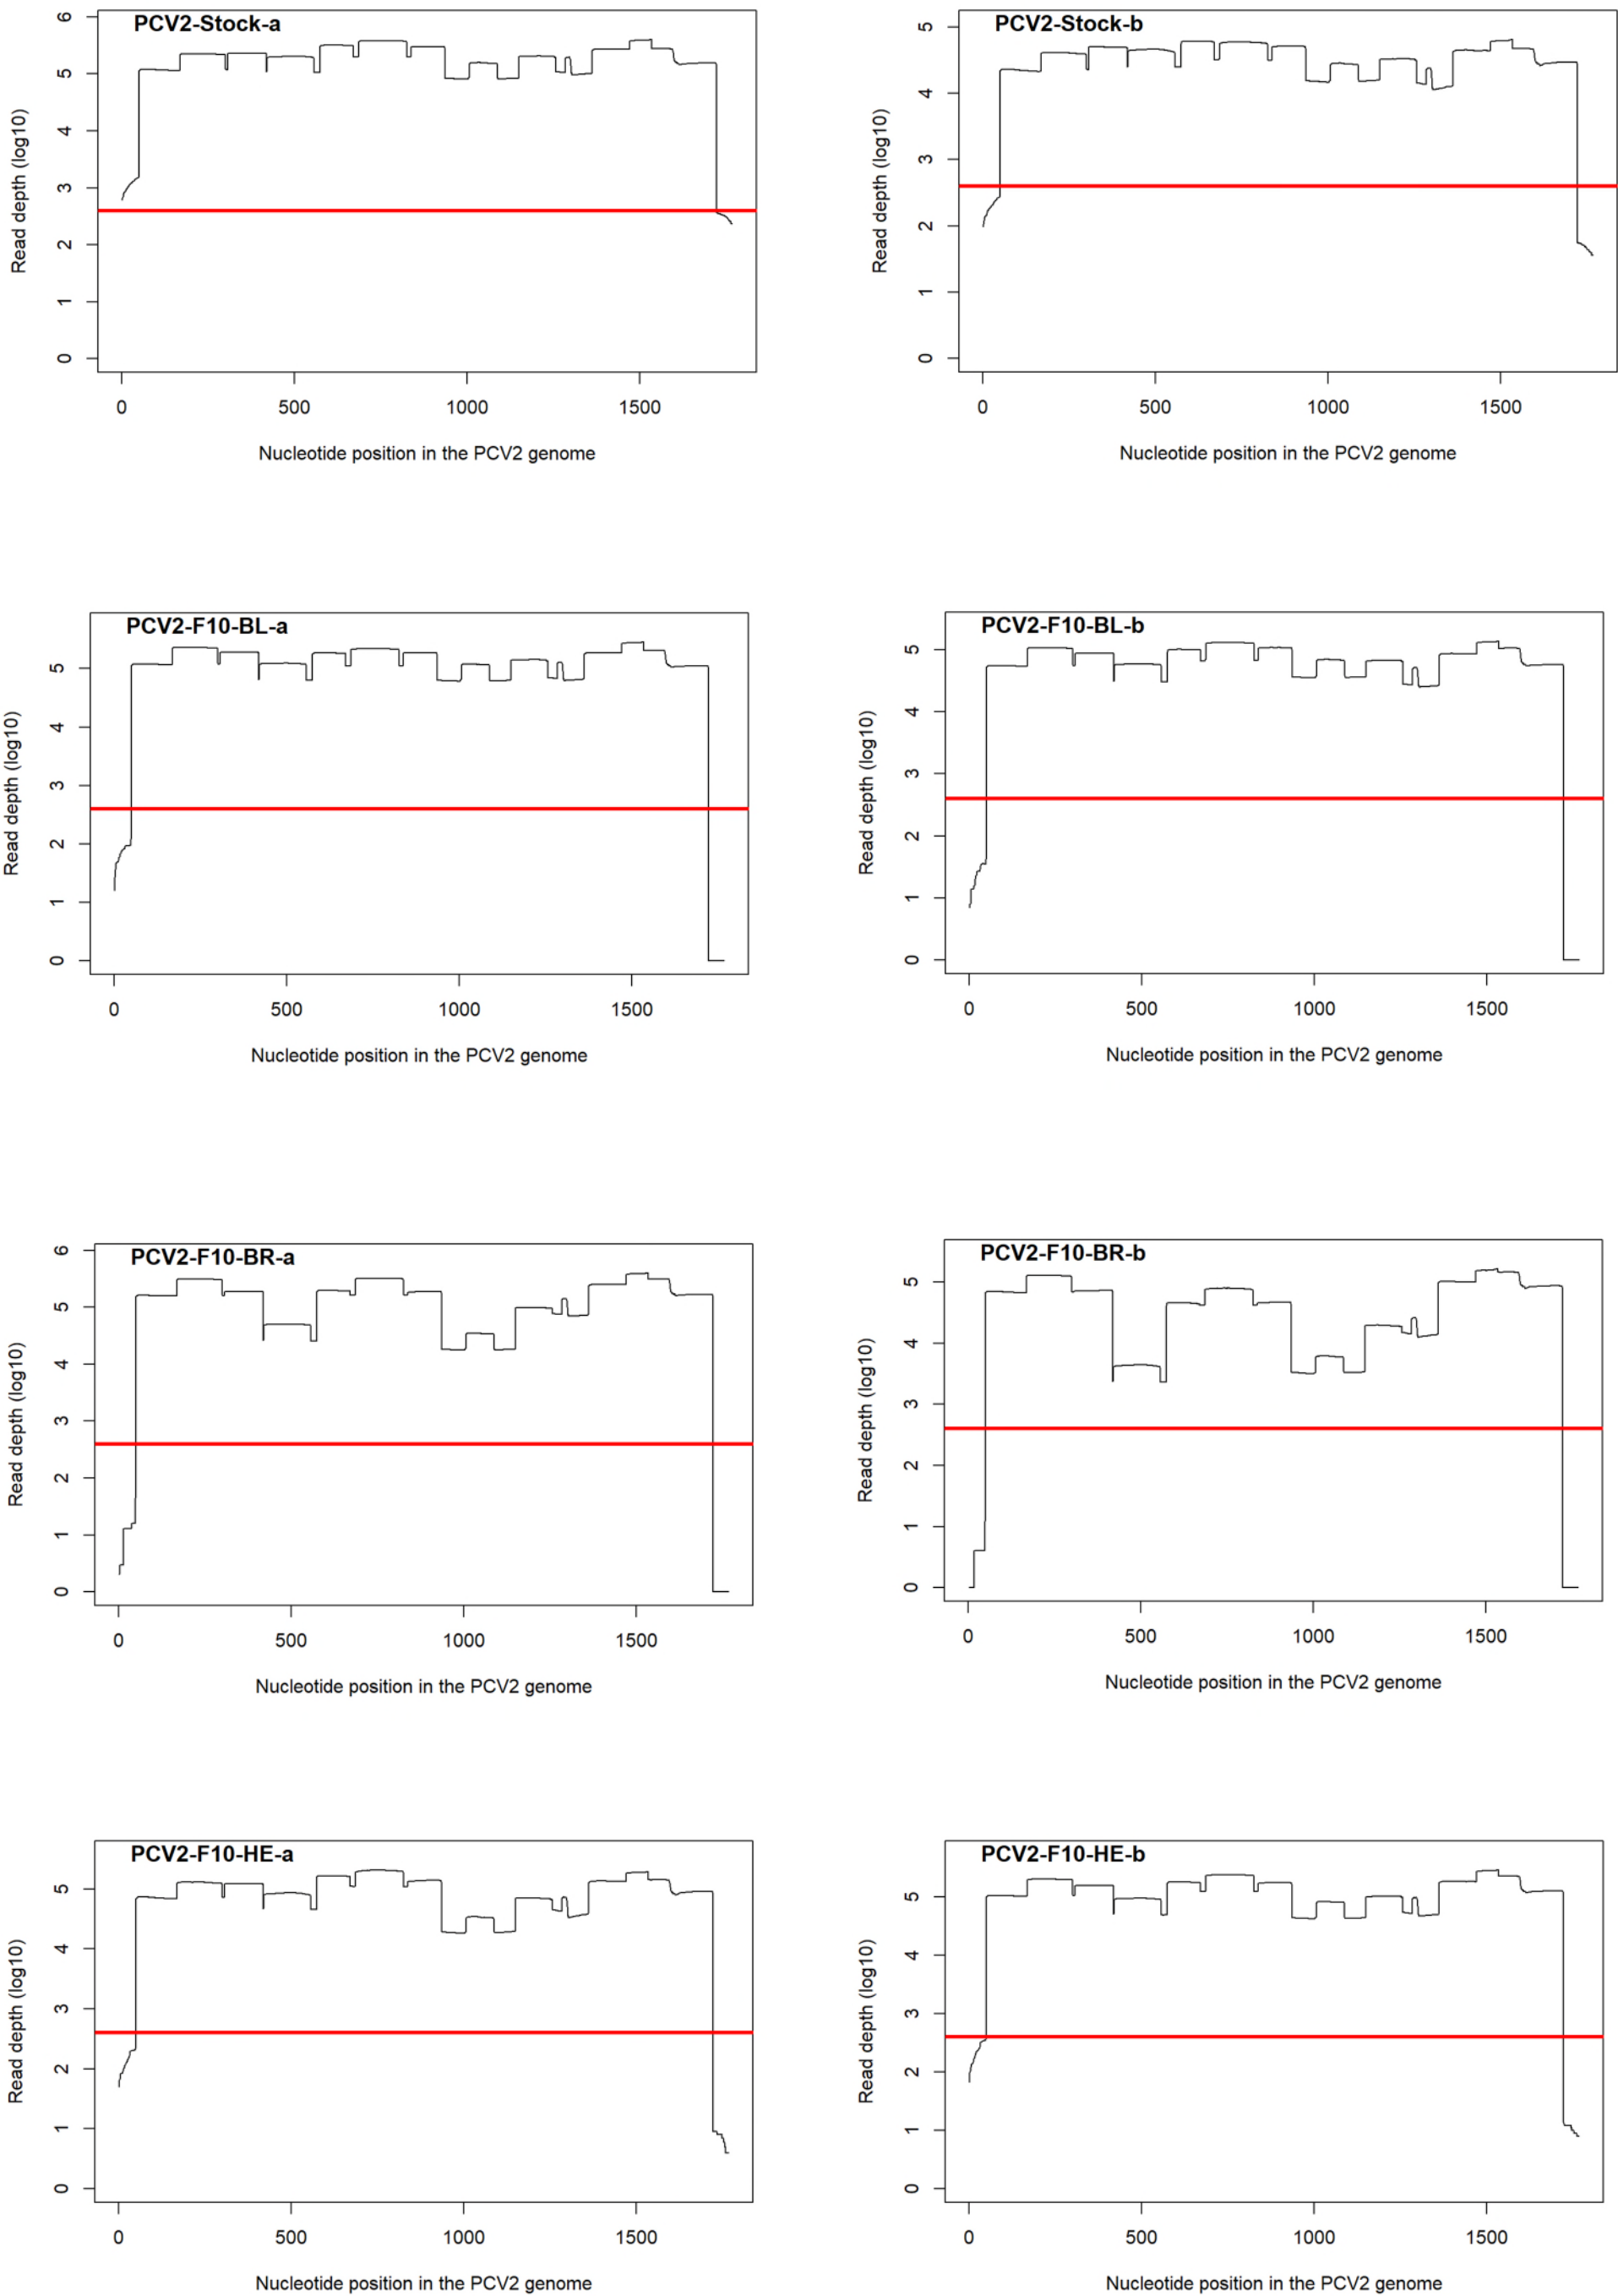

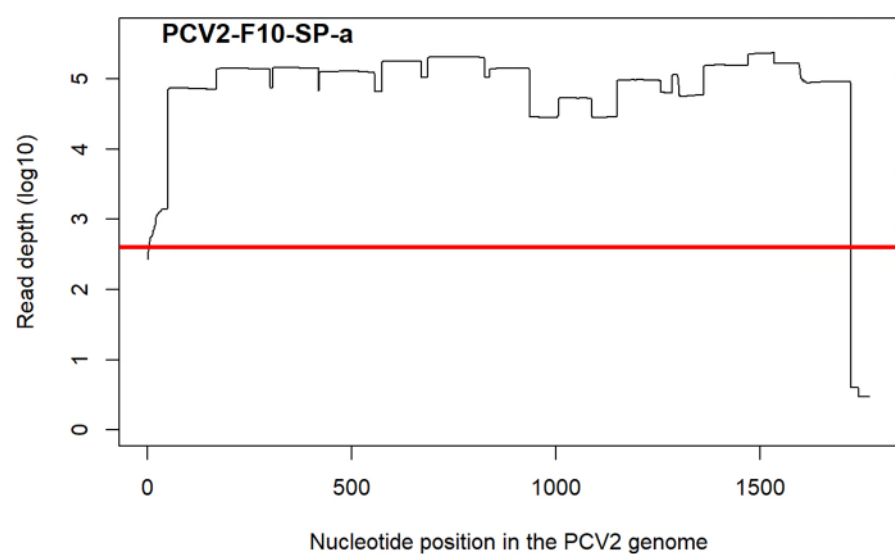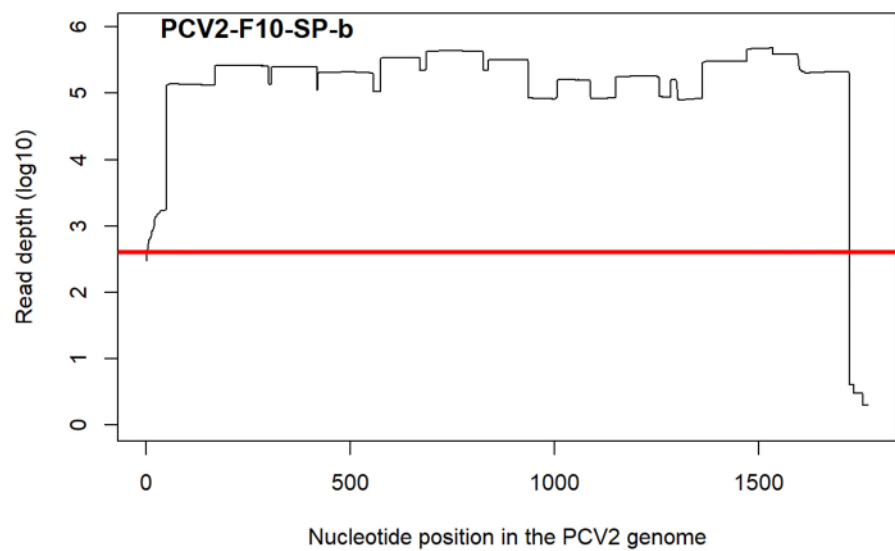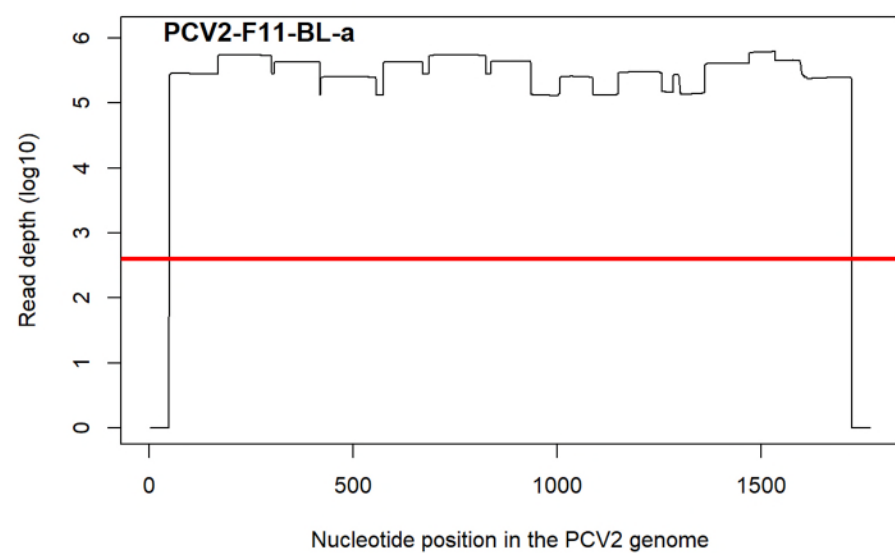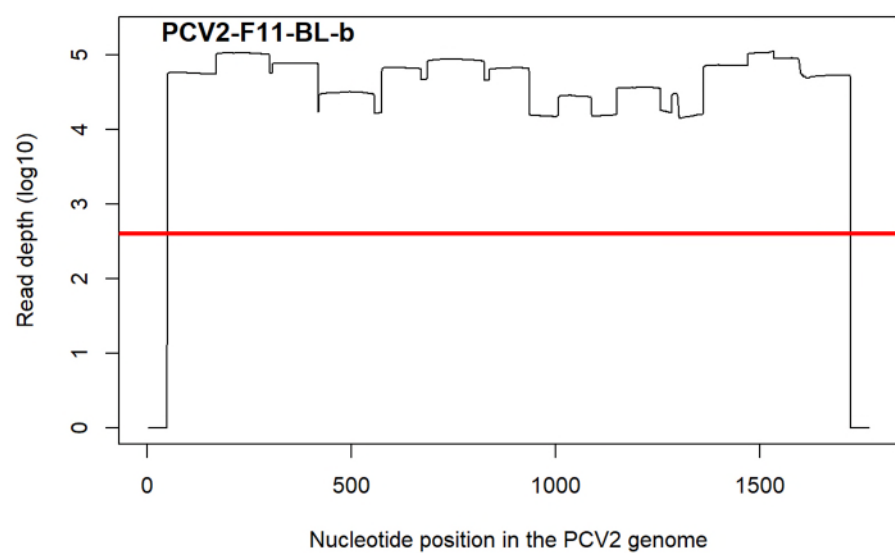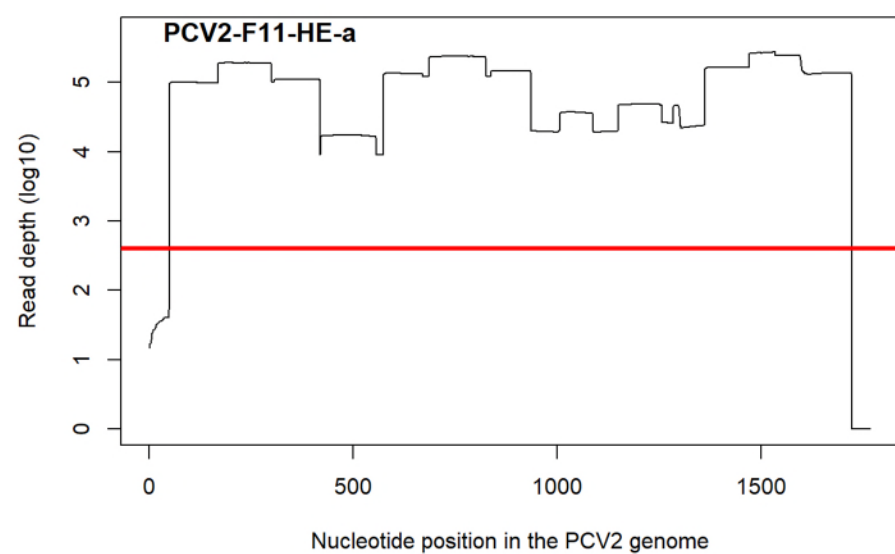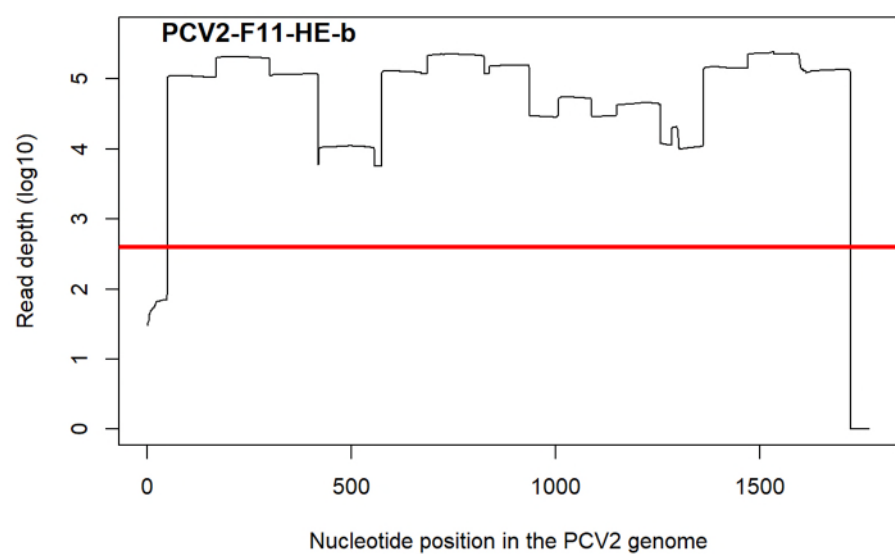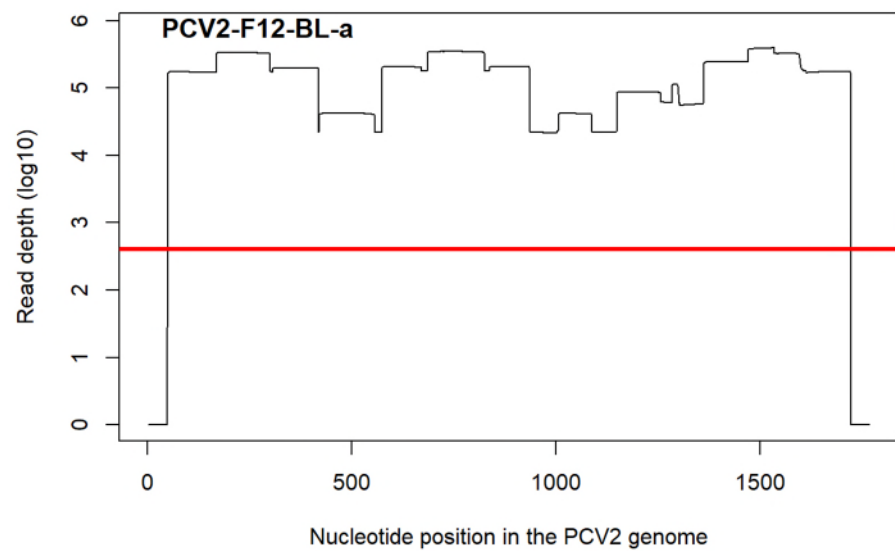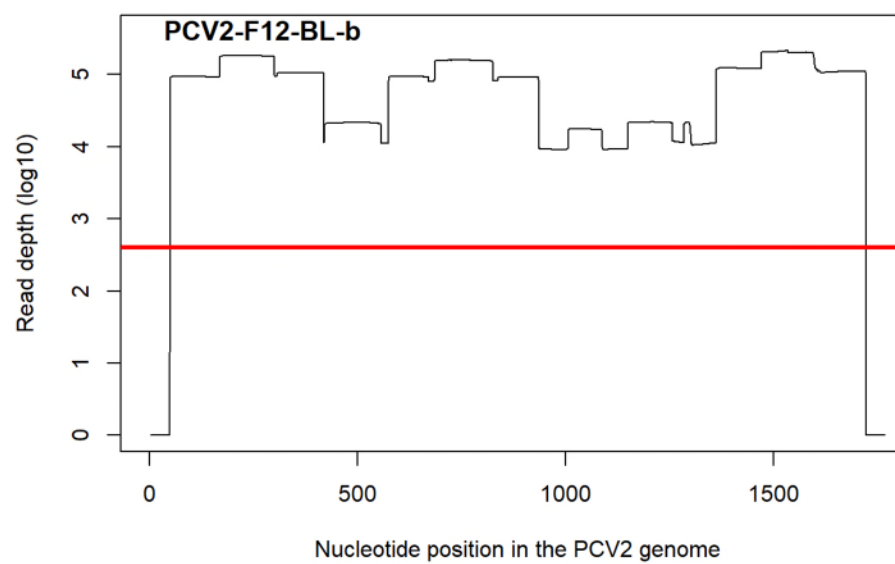

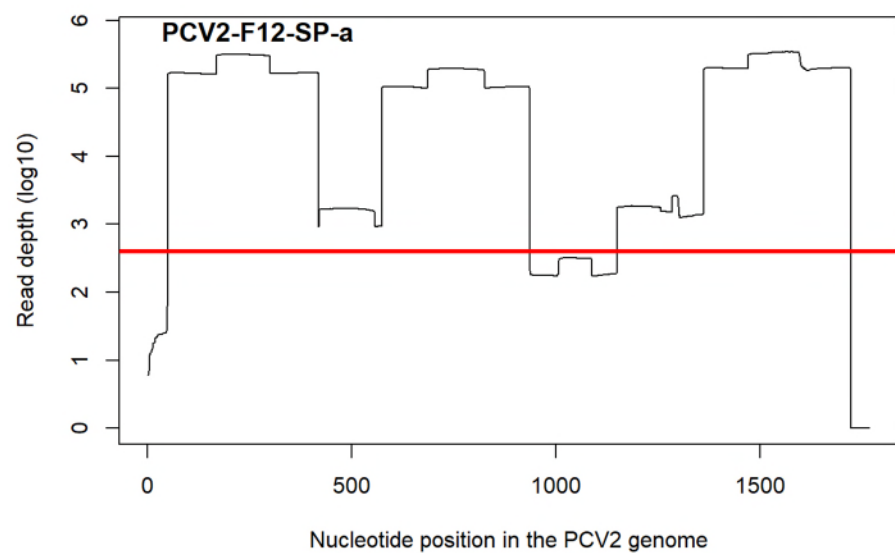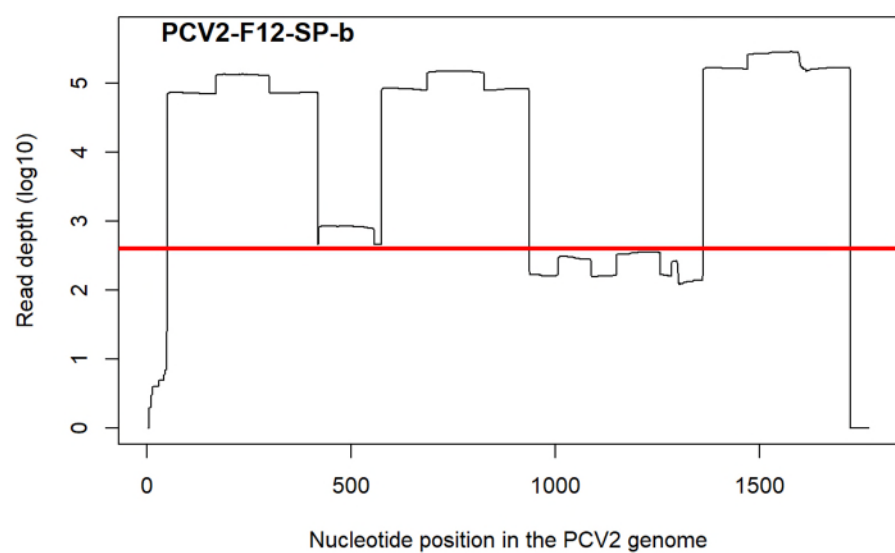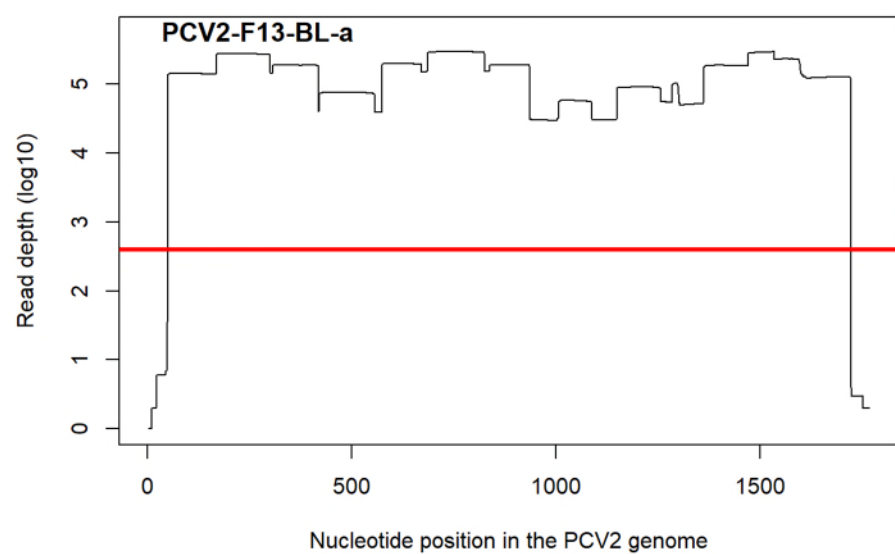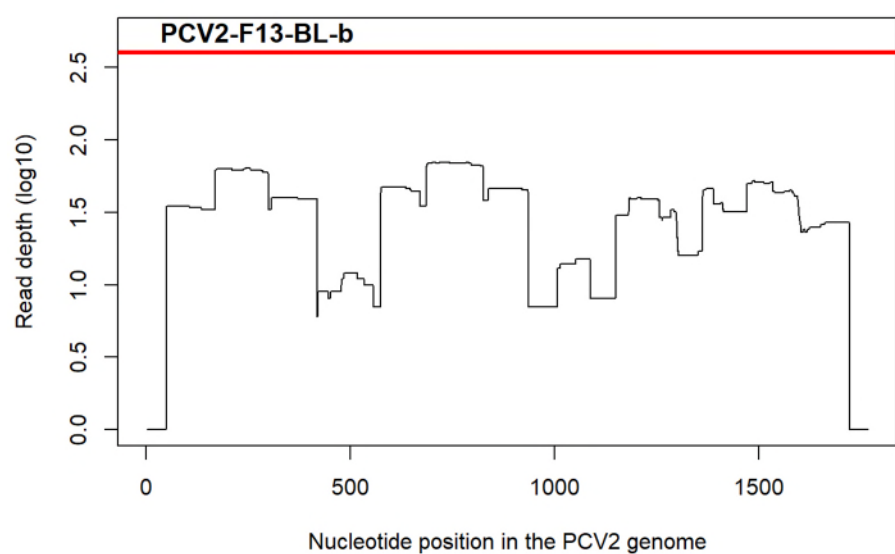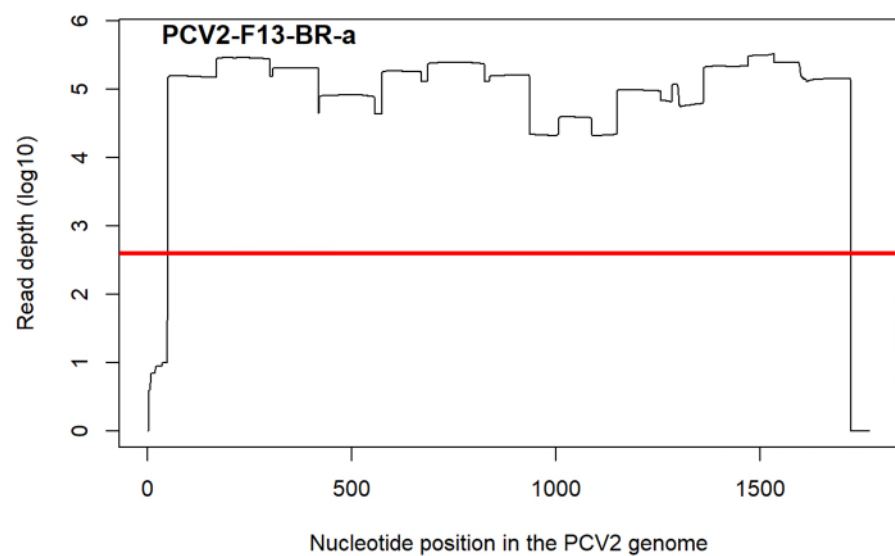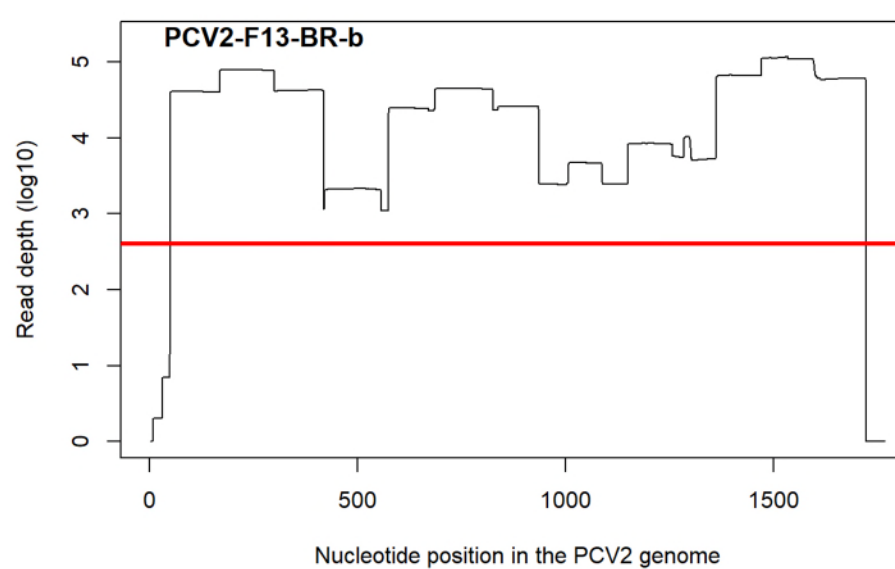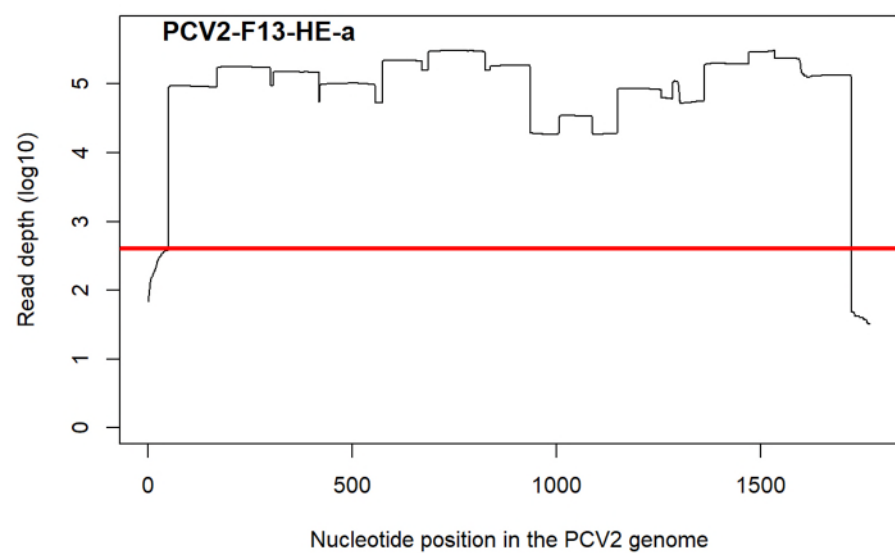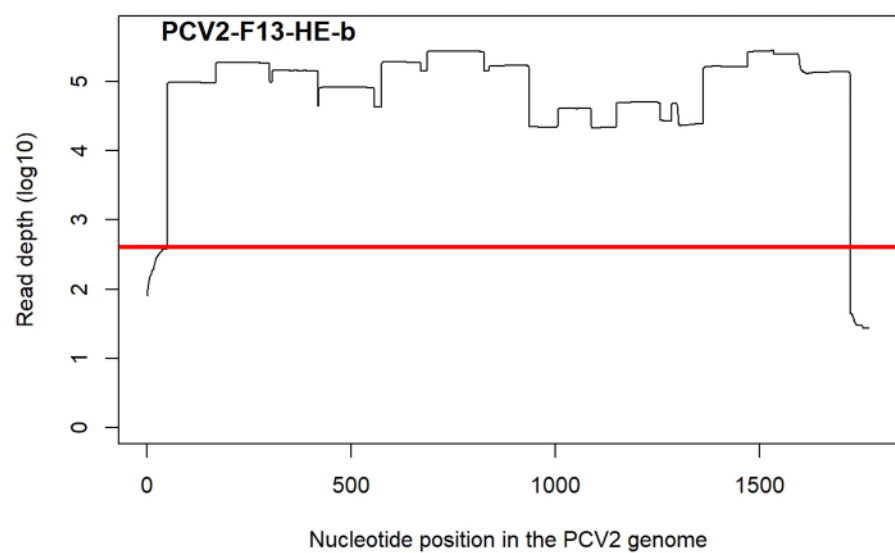

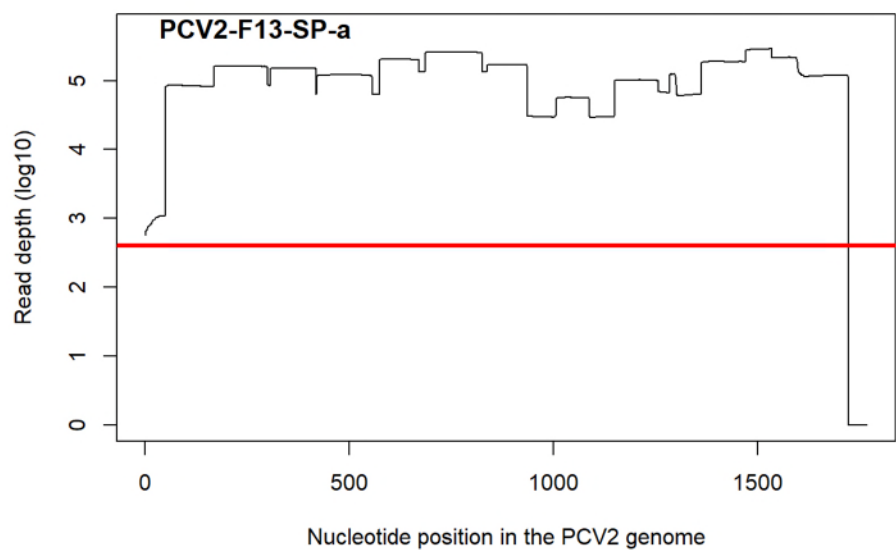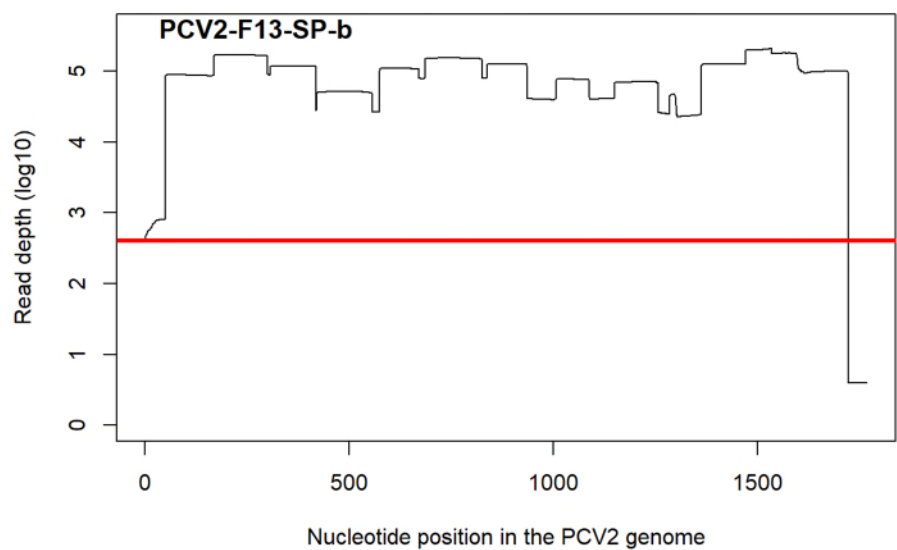

Supplement: s1 [file s1]

Figure. S1 Zika virus NGS coverage

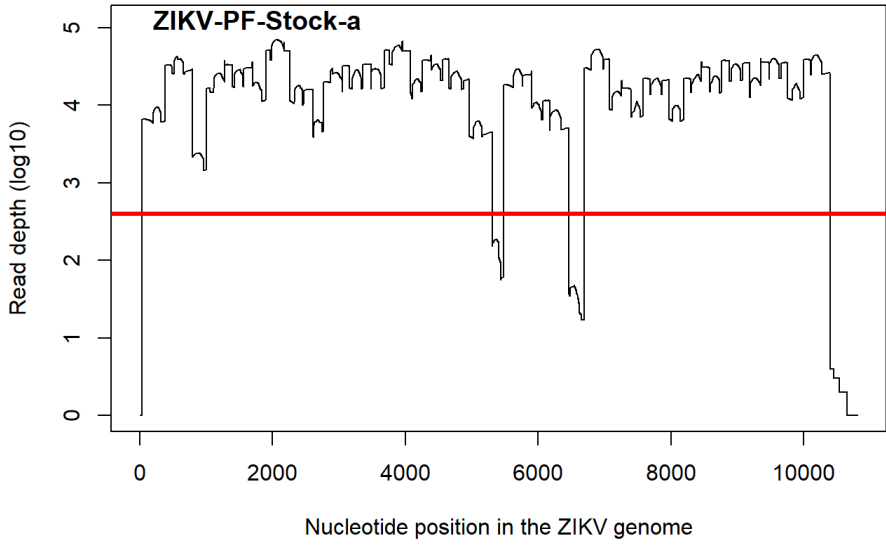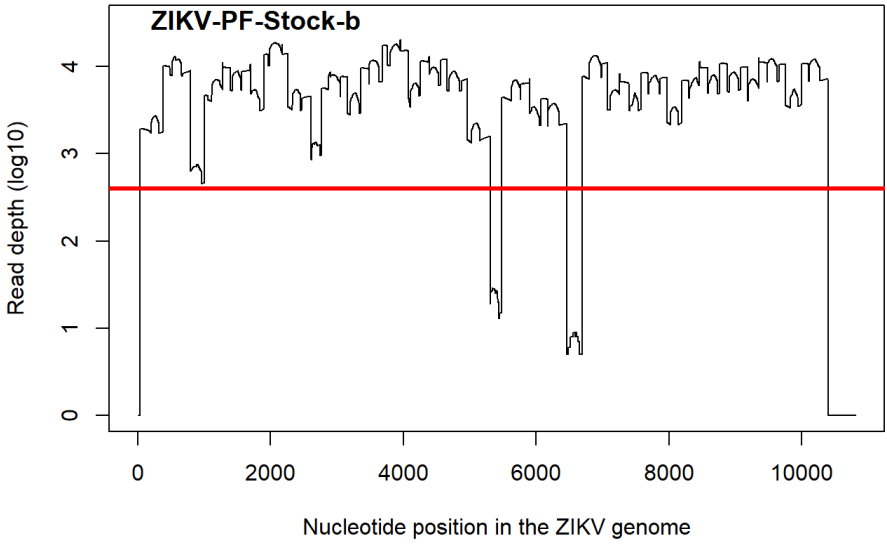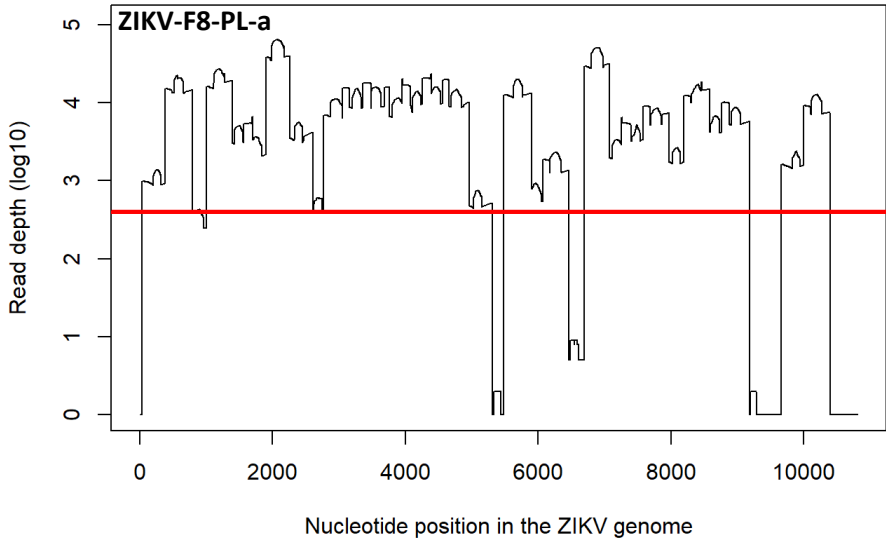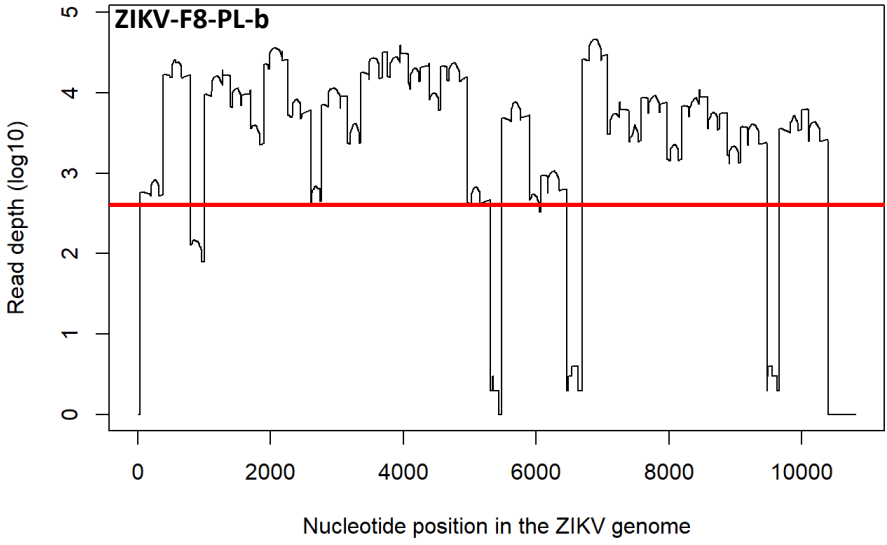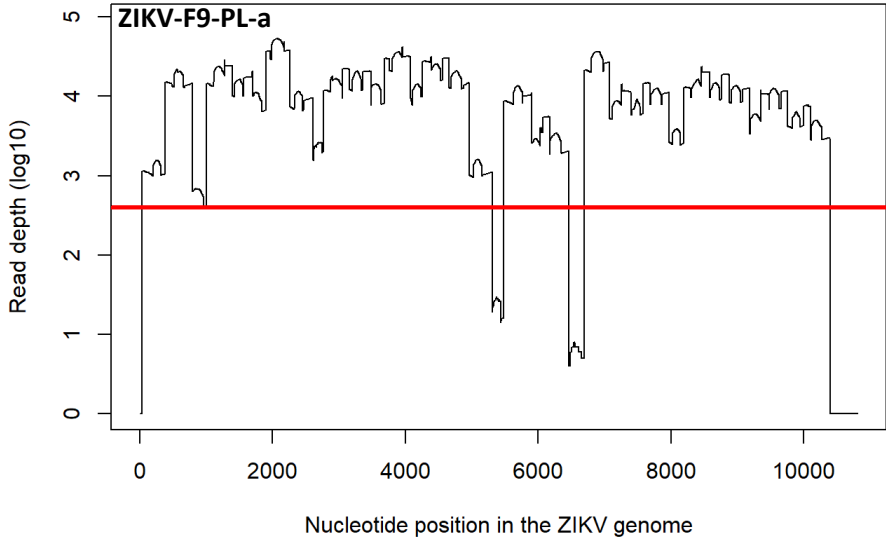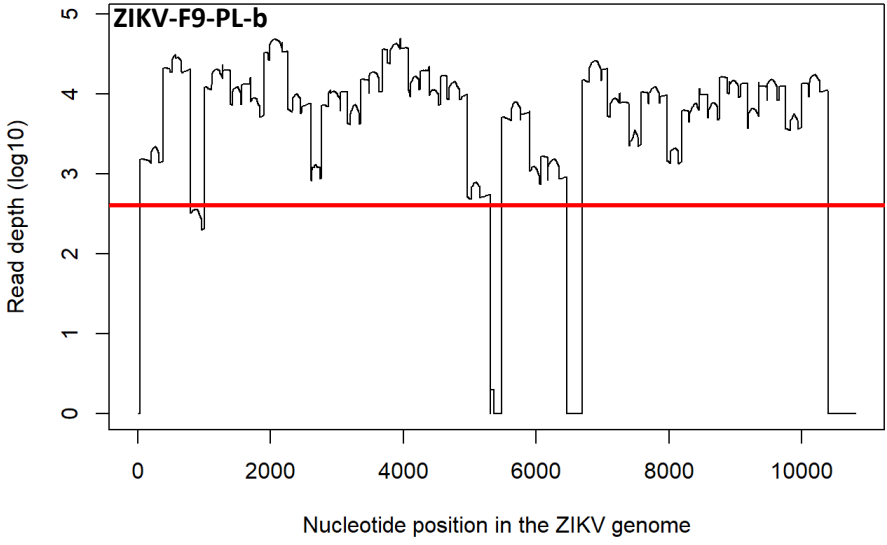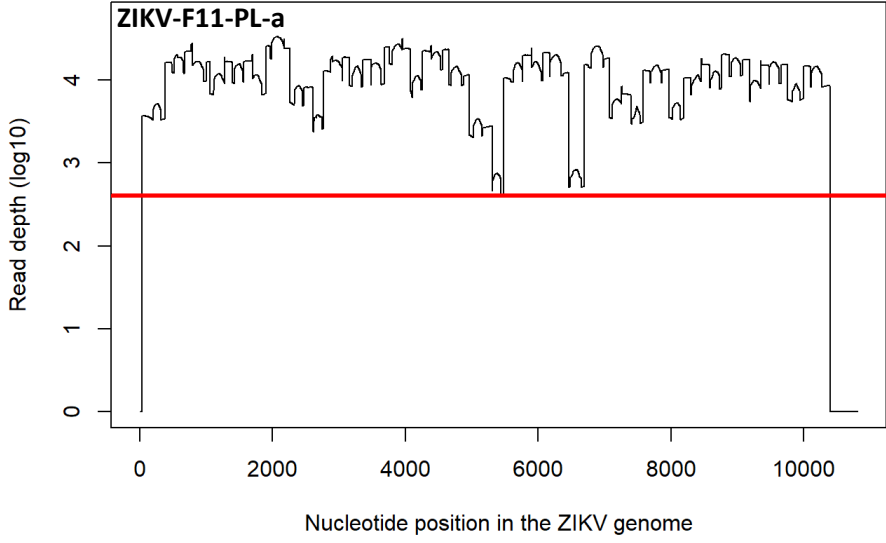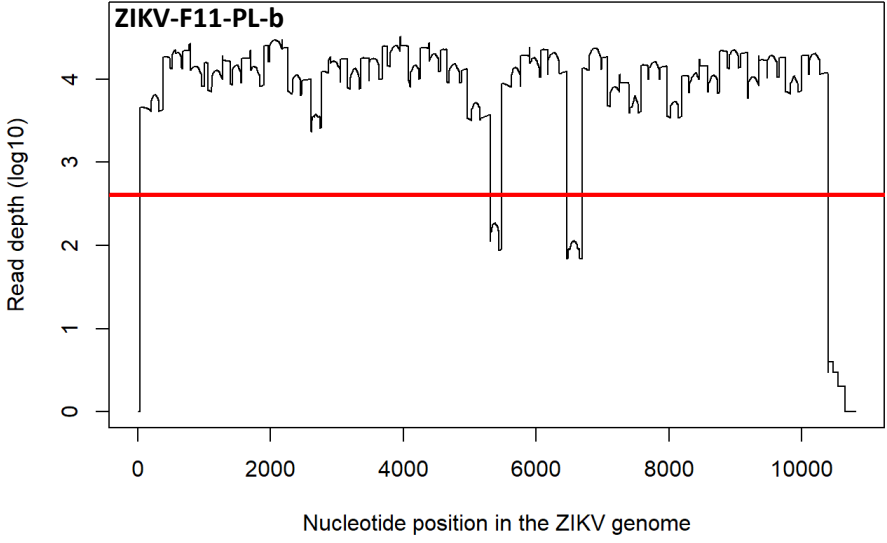

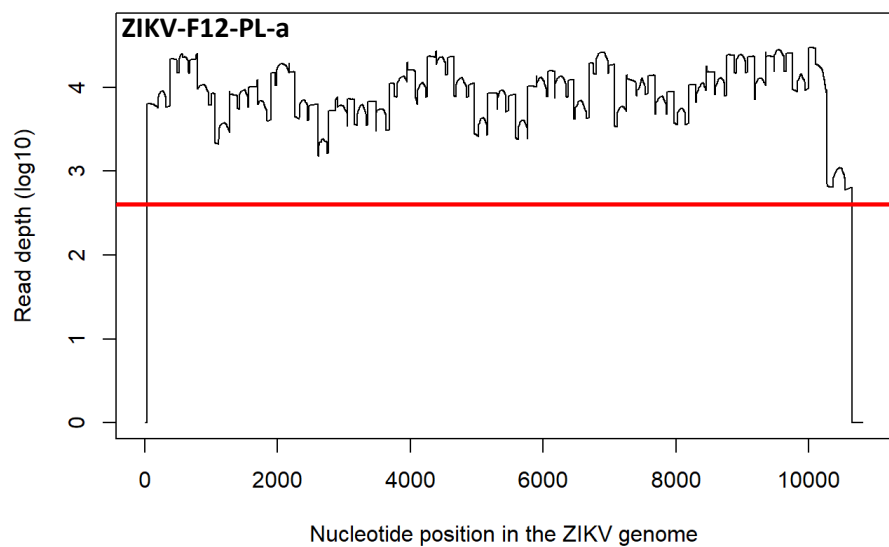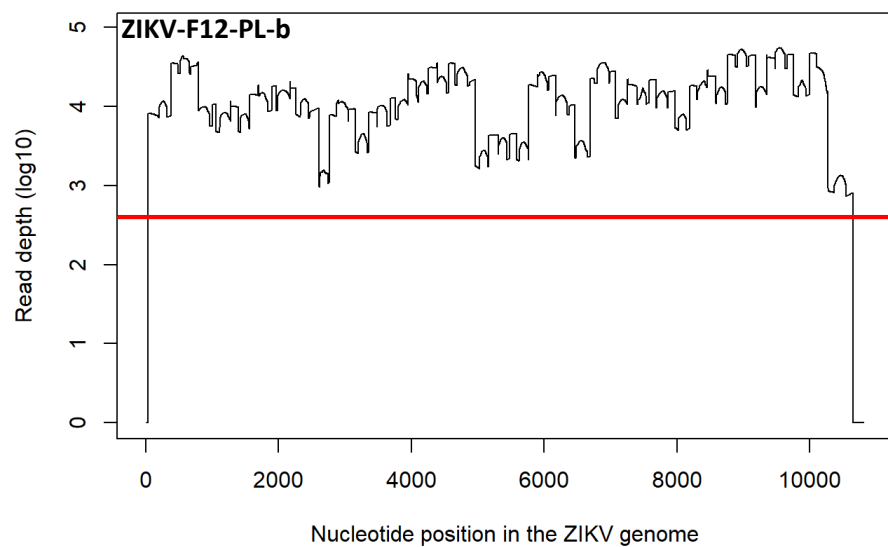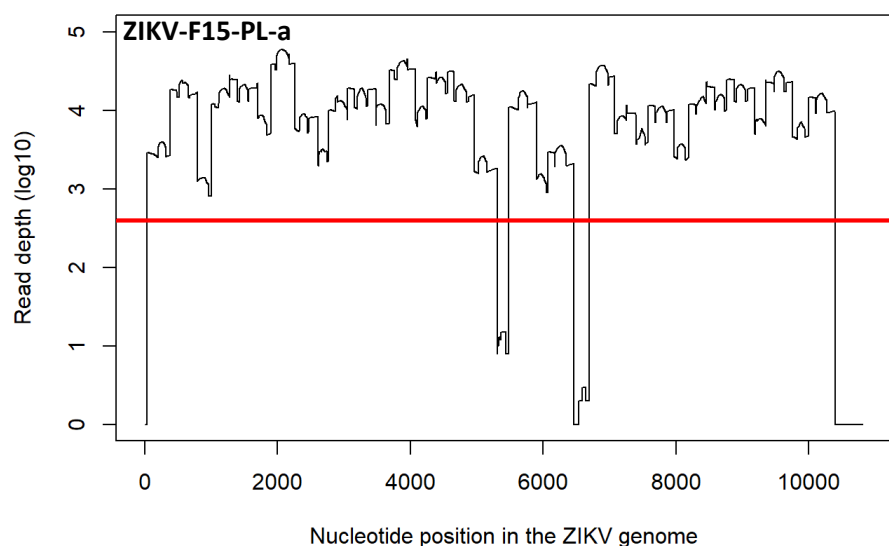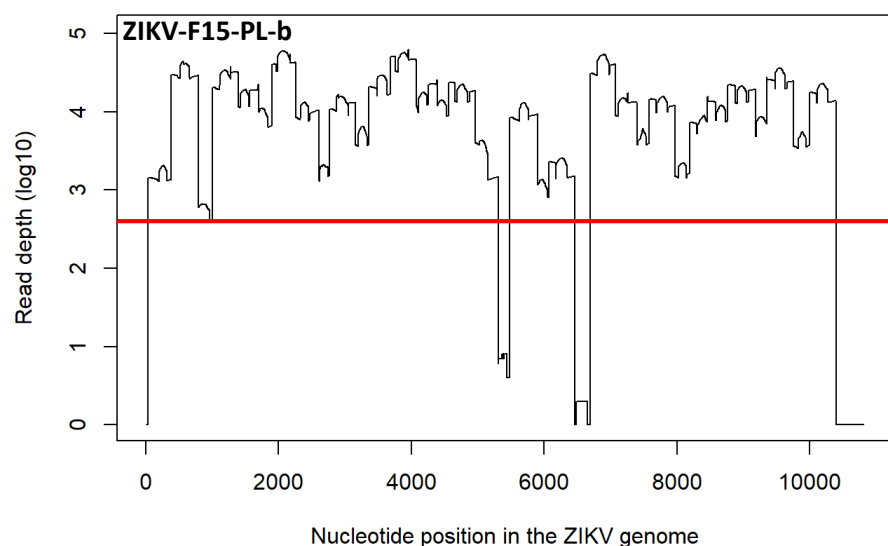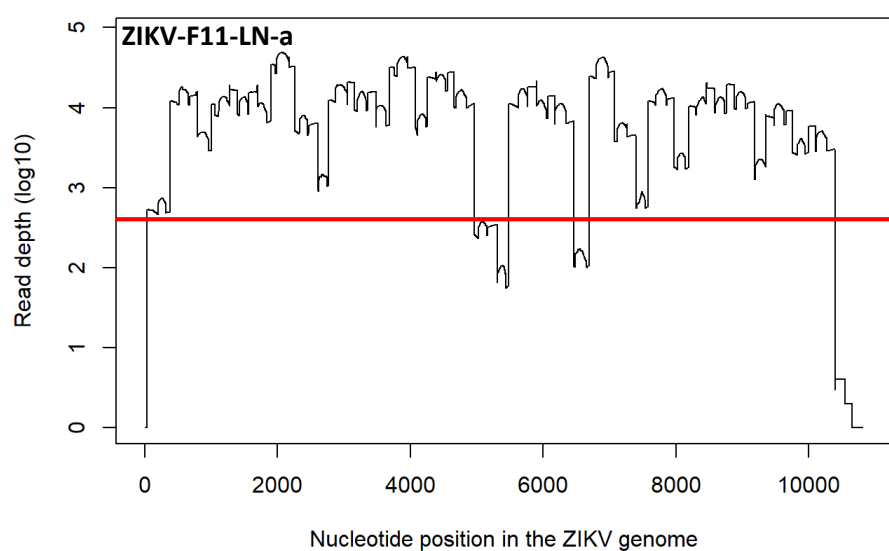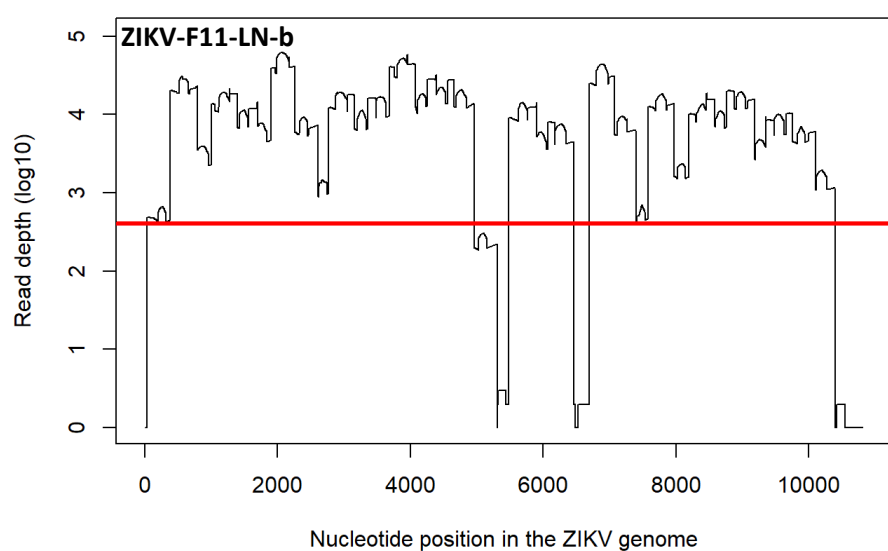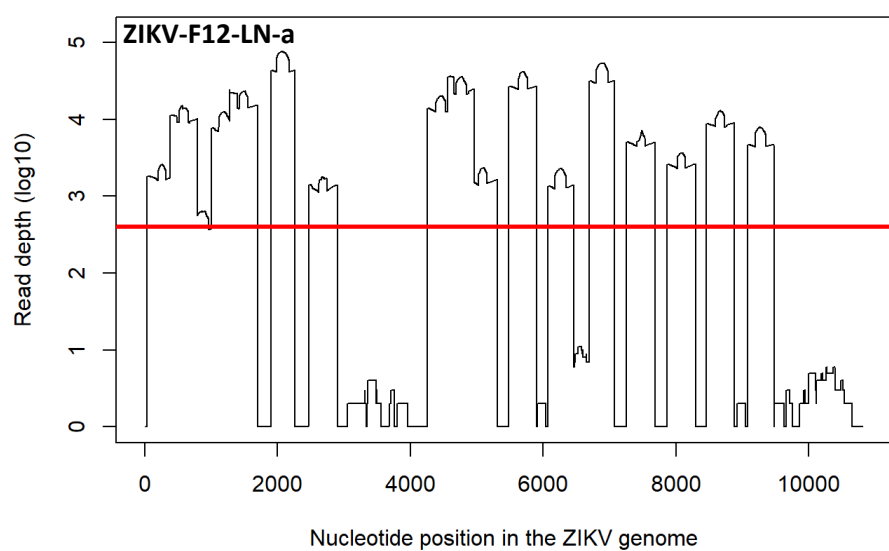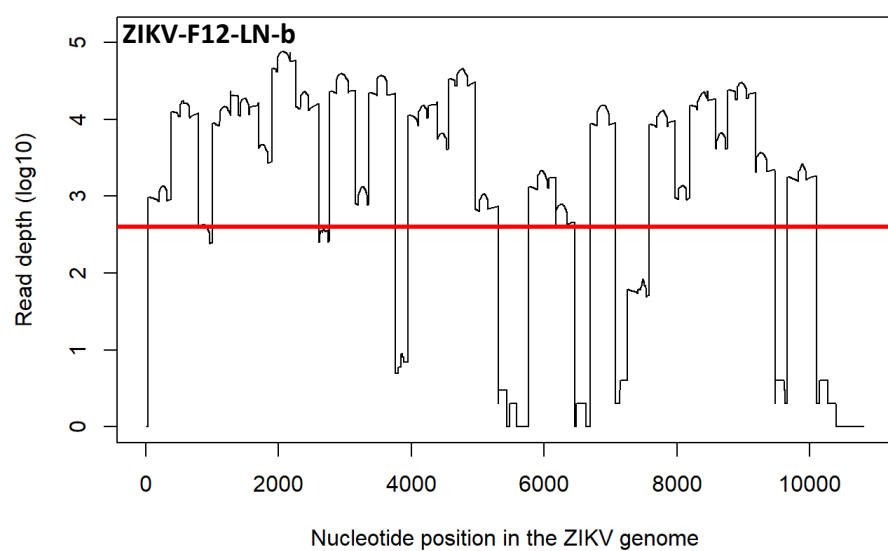

Supplement: s1 [file s1]
